# Supplementary material
Source: ML conference proceedings conference paper supplement (https://proceedings.mlr.press/v119/xie20d.html)
Supplement: Supplementary file [file xie20d-supp.pdf]

---

# Lower Complexity Bounds for Finite-Sum Convex-Concave Minimax Optimization Problems

---

Guangzeng Xie<sup>1</sup> Luo Luo<sup>2</sup> Yijiang Lian<sup>3</sup> Zhihua Zhang<sup>4,5</sup>

## Abstract

This paper studies the lower bound complexity for minimax optimization problem whose objective function is the average of  $n$  individual smooth convex-concave functions. We consider the algorithm which has access to gradient and proximal oracle for each individual component. For the strongly-convex-strongly-concave case, we prove such an algorithm can not reach an  $\varepsilon$ -saddle point in fewer than  $\Omega((n + \kappa) \log(1/\varepsilon))$  iterations, where  $\kappa$  is the condition number of the objective function. This lower bound matches the upper bound of the existing proximal incremental first-order oracle algorithm in some specific case. We develop a novel construction to show the above result, which partitions the tridiagonal matrix of classical examples into  $n$  groups. This construction is friendly to the analysis of incremental gradient and proximal oracle and we also extend the analysis to general convex-concave cases.

## 1. Introduction

We consider the following minimax optimization problem

$$\min_{\mathbf{x} \in \mathcal{X}} \max_{\mathbf{y} \in \mathcal{Y}} f(\mathbf{x}, \mathbf{y}) \triangleq \frac{1}{n} \sum_{i=1}^n f_i(\mathbf{x}, \mathbf{y}), \quad (1)$$

where each individual component  $f_i(\mathbf{x}, \mathbf{y})$  is  $L$ -smooth, convex in  $\mathbf{x}$  and concave in  $\mathbf{y}$ ; the feasible sets  $\mathcal{X}$  and  $\mathcal{Y}$  are close and convex such that  $\mathcal{X} \subseteq \mathbb{R}^{d_x}$  and  $\mathcal{Y} \subseteq \mathbb{R}^{d_y}$ .

---

<sup>1</sup>Academy for Advanced Interdisciplinary Studies, Peking University <sup>2</sup>Department of Mathematics, Hong Kong University of Science and Technology <sup>3</sup>Baidu Inc., Beijing <sup>4</sup>School of Mathematical Sciences, Peking University <sup>5</sup>Huawei Noah's Ark Lab, Beijing. Correspondence to: Guangzeng Xie <smsxgz@pku.edu.cn>, Luo Luo <luoluo@ust.hk>, Zhihua Zhang <zhzhang@math.pku.edu.cn>, Yijiang Lian <lianyijiang@baidu.com>.

This formulation contains several popular machine learning applications such as matrix games (Carmon et al., 2019; Ibrahim et al., 2019), regularized empirical risk minimization (Zhang & Xiao, 2017; Tan et al., 2018), AUC maximization (Joachims, 2005; Ying et al., 2016; Shen et al., 2018), robust optimization (Ben-Tal et al., 2009; Yan et al., 2019) and reinforcement learning (Du et al., 2017).

A popular approach for solving minimax problems is the first order algorithm which iterates with gradient and proximal point operation (Korpelevich, 1977; Chen & Rockafellar, 1997; Chambolle & Pock, 2011; 2016; Mokhtari et al., 2019a;b; Thekumparampil et al., 2019). Zhang et al. (2019); Ibrahim et al. (2019) presented tight lower bounds for solving strongly-convex-strongly-concave minimax problems by first order algorithms. Ouyang & Xu (2018) studied a more general case that the objective function is possibly not strongly-convex or strongly-concave. However, these analyses (Ouyang & Xu, 2018; Zhang et al., 2019; Ibrahim et al., 2019) do not consider the specific finite-sum structure as in Problem (1). They only consider the deterministic first order algorithms which are based on the full gradient and exact proximal point iteration.

In big data regime, the number of components  $n$  in Problem (1) could be very large and we would like to devise stochastic optimization algorithms that avoid accessing the full gradient frequently. For example, Palaniappan & Bach (2016) used stochastic variance reduced gradient algorithms to solve (1). Similar to convex optimization, one can accelerate it by catalyst (Lin et al., 2018; Palaniappan & Bach, 2016) and proximal point (Defazio, 2016; Luo et al., 2019) techniques. Although stochastic optimization algorithms are widely used for solving minimax problems, the study of their lower bounds complexity is still open. All of existing lower bound analysis for stochastic optimization are focused on convex or nonconvex minimization problems (Agarwal & Bottou, 2015; Woodworth & Srebro, 2016; Carmon et al., 2017; Lan & Zhou, 2017; Fang et al., 2018; Arjevani et al., 2019).

This paper focuses on stochastic first order methods for solving Problem (1), which access to the Proximal Incremental

First-order Oracle (PIFO), that is,

$$h_{f_i}(\mathbf{x}, \mathbf{y}, \gamma) \triangleq [f_i(\mathbf{x}, \mathbf{y}), \nabla f_i(\mathbf{x}, \mathbf{y}), \text{prox}_{f_i}^\gamma(\mathbf{x}, \mathbf{y}), \mathcal{P}_{\mathcal{X}}(\mathbf{x}), \mathcal{P}_{\mathcal{Y}}(\mathbf{y})], \quad (2)$$

where  $i \in \{1, \dots, n\}$ ,  $\gamma > 0$ , the proximal operator is defined as

$$\text{prox}_{f_i}^\gamma(\mathbf{x}, \mathbf{y}) \triangleq \arg \min_{\mathbf{u} \in \mathbb{R}^{d_x}} \max_{\mathbf{v} \in \mathbb{R}^{d_y}} \left\{ f_i(\mathbf{u}, \mathbf{v}) + \frac{1}{2\gamma} \|\mathbf{x} - \mathbf{u}\|_2^2 - \frac{1}{2\gamma} \|\mathbf{y} - \mathbf{v}\|_2^2 \right\},$$

and the projection operator is defined as

$$\mathcal{P}_{\mathcal{X}}(\mathbf{x}) = \arg \min_{\mathbf{u} \in \mathcal{X}} \|\mathbf{u} - \mathbf{x}\|_2, \quad \mathcal{P}_{\mathcal{Y}}(\mathbf{y}) = \arg \min_{\mathbf{v} \in \mathcal{Y}} \|\mathbf{v} - \mathbf{y}\|_2.$$

We also define the Incremental First-order Oracle (IFO)

$$g_{f_i}(\mathbf{x}, \mathbf{y}, \gamma) \triangleq [f_i(\mathbf{x}, \mathbf{y}), \nabla f_i(\mathbf{x}, \mathbf{y}), \mathcal{P}_{\mathcal{X}}(\mathbf{x}), \mathcal{P}_{\mathcal{Y}}(\mathbf{y})].$$

PIFO provides more information than IFO and it would be potentially more powerful than IFO in first order optimization algorithms. Our goal is to find an  $\varepsilon$ -saddle point whose Euclidean squared distance to the exact solution of Problem (1) is not larger than  $\varepsilon$  or  $\varepsilon$ -suboptimal solution such that the primal dual gap is not larger than  $\varepsilon$ .

In this paper we show that the PIFO algorithm requires at least  $\Omega((n + L/\mu) \log(1/\varepsilon))$  complexity to find an  $\varepsilon$ -saddle point of Problem (1) when each  $f_i$  is  $L$ -smooth and convex-concave;  $f$  is  $\mu$ -strongly-convex- $\mu$ -strongly-concave. This result matches the upper bound of the existing PIFO algorithm (Zhang & Xiao, 2017; Lan & Zhou, 2017) for some specific bilinear problems. We also consider more general cases. When  $f$  is  $\mu$ -strongly-concave but possibly non-strongly-concave, we establish a PIFO lower bound complexity  $\Omega(n + L/\sqrt{\mu\varepsilon})$ . If there is neither strongly-convexity nor strongly-concavity assumption, we prove that the PIFO lower bound will be  $\Omega(n + L/\varepsilon)$ .

The above results are mainly due to a novel lower bound analysis framework proposed in this paper, which is quite different from previous work. Our construction decomposes Nesterov's classical tridiagonal matrix into  $n$  groups and it facilitates the analysis for both the IFO and PIFO algorithms. In contrast, previous work is based on an aggregation method (Lan & Zhou, 2017; Zhou & Gu, 2019) or a very complicated adversarial construction (Woodworth & Srebro, 2016). Their results do not cover the minimax problems.

The remainder of the paper is organized as follows. In Section 2, we present preliminaries. In Section 3, we introduce the basic idea of our analysis framework. In Section 4, we provide the specific construction for the lower bound analysis. We compare our method to related work in Section 5 and conclude this work in Section 6.

## 2. Preliminaries

We first introduce the preliminaries used in this paper.

**Definition 1.** For a differentiable function  $\varphi(\mathbf{x}, \mathbf{y})$  from  $\mathcal{X} \times \mathcal{Y}$  to  $\mathbb{R}$  and  $L > 0$ ,  $\varphi$  is said to be  $L$ -smooth if its gradient is  $L$ -Lipschitz continuous; that is, for any  $\mathbf{x}_1, \mathbf{x}_2 \in \mathcal{X}$  and  $\mathbf{y}_1, \mathbf{y}_2 \in \mathcal{Y}$ , we have

$$\|\nabla \varphi(\mathbf{x}_1, \mathbf{y}_1) - \nabla \varphi(\mathbf{x}_2, \mathbf{y}_2)\|_2 \leq L \left\| \begin{array}{c} \mathbf{x}_1 - \mathbf{x}_2 \\ \mathbf{y}_1 - \mathbf{y}_2 \end{array} \right\|_2.$$

**Definition 2.** For a differentiable function  $\varphi(\mathbf{x}, \mathbf{y})$  from  $\mathcal{X} \times \mathcal{Y}$  to  $\mathbb{R}$ ,  $\varphi$  is said to be convex-concave, if  $\varphi$  is convex in  $\mathbf{x}$  and concave in  $\mathbf{y}$ ; that is, for any  $\mathbf{x}_1, \mathbf{x}_2 \in \mathcal{X}$ ,  $\mathbf{y}_1, \mathbf{y}_2 \in \mathcal{Y}$  we have

$$\begin{aligned} \varphi(\mathbf{x}_2, \mathbf{y}) &\geq \varphi(\mathbf{x}_1, \mathbf{y}) + \nabla_{\mathbf{x}} \varphi(\mathbf{x}_1, \mathbf{y})^\top (\mathbf{x}_2 - \mathbf{x}_1), \\ \varphi(\mathbf{x}, \mathbf{y}_2) &\leq \varphi(\mathbf{x}, \mathbf{y}_1) + \nabla_{\mathbf{y}} \varphi(\mathbf{x}, \mathbf{y}_1)^\top (\mathbf{y}_2 - \mathbf{y}_1). \end{aligned}$$

**Definition 3.** For constants  $\mu_x, \mu_y \geq 0$ ,  $\varphi$  is said to be  $(\mu_x, \mu_y)$ -convex-concave, if the function

$$\hat{\varphi}(\mathbf{x}, \mathbf{y}) = \varphi(\mathbf{x}, \mathbf{y}) - \frac{\mu_x}{2} \|\mathbf{x}\|_2^2 + \frac{\mu_y}{2} \|\mathbf{y}\|_2^2$$

is convex-concave.

**Remark 1.** In Definition 3, we allow both  $\mu_x$  and  $\mu_y$  could be 0. In other words, we say that  $\varphi(\mathbf{x}, \mathbf{y})$  is  $(0, 0)$ -convex-concave means the function is general convex-concave and  $(0, \mu)$ -convex-concave means it is  $\mu$ -strongly-concave in  $\mathbf{y}$  but possibly non-strongly-convex in  $\mathbf{x}$ .

**Definition 4.** We call a minimax optimization problem  $\min_{\mathbf{x} \in \mathcal{X}} \max_{\mathbf{y} \in \mathcal{Y}} \varphi(\mathbf{x}, \mathbf{y})$  satisfying strong duality condition if

$$\min_{\mathbf{x} \in \mathcal{X}} \max_{\mathbf{y} \in \mathcal{Y}} \varphi(\mathbf{x}, \mathbf{y}) = \max_{\mathbf{y} \in \mathcal{Y}} \min_{\mathbf{x} \in \mathcal{X}} \varphi(\mathbf{x}, \mathbf{y}).$$

The goal of a stochastic optimization algorithm for solving the minimax problem is finding an  $\varepsilon$ -suboptimal solution or  $\varepsilon$ -saddle point which are defined as follows.

**Definition 5.** Suppose the strong duality of Problem (1) holds. We call  $(\hat{\mathbf{x}}, \hat{\mathbf{y}}) \in \mathcal{X} \times \mathcal{Y}$  an  $\varepsilon$ -suboptimal solution to Problem (1), if

$$\max_{\mathbf{y} \in \mathcal{Y}} f(\hat{\mathbf{x}}, \mathbf{y}) - \min_{\mathbf{x} \in \mathcal{X}} f(\mathbf{x}, \hat{\mathbf{y}}) \leq \varepsilon.$$

**Definition 6.** Suppose Problem (1) has an exact optimal solution  $(\mathbf{x}^*, \mathbf{y}^*) \in \mathcal{X} \times \mathcal{Y}$  such that

$$f(\mathbf{x}^*, \mathbf{y}) \leq f(\mathbf{x}^*, \mathbf{y}^*) \leq f(\mathbf{x}, \mathbf{y}^*)$$

for all  $\mathbf{x} \in \mathcal{X}$  and  $\mathbf{y} \in \mathcal{Y}$ . We call  $(\hat{\mathbf{x}}, \hat{\mathbf{y}}) \in \mathcal{X} \times \mathcal{Y}$  an  $\varepsilon$ -saddle point of Problem (1), if  $\|\hat{\mathbf{x}} - \mathbf{x}^*\|_2^2 + \|\hat{\mathbf{y}} - \mathbf{y}^*\|_2^2 \leq \varepsilon$ .

We define PIFO algorithms as follows.

**Definition 7.** Consider a stochastic optimization algorithm  $\mathcal{A}$  to solve Problem (1). Denote  $(\mathbf{x}_t, \mathbf{y}_t)$  to be the point obtained by  $\mathcal{A}$  at time-step  $t$ . The algorithm is said to be a PIFO algorithm if for any  $t > 0$ , we have

$$\begin{aligned} \tilde{\mathbf{x}}_t &\in \text{span} \left\{ \mathbf{x}_0, \dots, \mathbf{x}_{t-1}, \mathbf{u}_1, \dots, \mathbf{u}_t, \right. \\ &\quad \left. \nabla_{\mathbf{x}} f_{i_1}(\mathbf{x}_0, \mathbf{y}_0), \dots, \nabla_{\mathbf{x}} f_{i_t}(\mathbf{x}_{t-1}, \mathbf{y}_{t-1}) \right\}, \\ \tilde{\mathbf{y}}_t &\in \text{span} \left\{ \mathbf{y}_0, \dots, \mathbf{y}_{t-1}, \mathbf{v}_1, \dots, \mathbf{v}_t, \right. \\ &\quad \left. \nabla_{\mathbf{y}} f_{i_1}(\mathbf{x}_0, \mathbf{y}_0), \dots, \nabla_{\mathbf{y}} f_{i_t}(\mathbf{x}_{t-1}, \mathbf{y}_{t-1}) \right\}, \\ \mathbf{x}_t &= \mathcal{P}_{\mathcal{X}}(\tilde{\mathbf{x}}_t), \text{ and } \mathbf{y}_t = \mathcal{P}_{\mathcal{Y}}(\tilde{\mathbf{y}}_t), \end{aligned}$$

where  $(\mathbf{u}_t, \mathbf{v}_t) = \text{prox}_{f_{i_t}}^{\gamma_t}(\mathbf{x}_{t-1}, \mathbf{y}_{t-1})$  and  $i_t$  is a random variable supported on  $[n]$  by taking  $\mathbb{P}(i_t = j) = p_j$  for each  $t \geq 1$  and  $1 \leq j \leq n$  along with  $\sum_{j=1}^n p_j = 1$ .

Without loss of generality, we assume that the PIFO algorithm  $\mathcal{A}$  starts from  $(\mathbf{x}_0, \mathbf{y}_0) = (\mathbf{0}_{d_x}, \mathbf{0}_{d_y})$  and  $p_1 \leq p_2 \leq \dots \leq p_n$  to simplify our analysis. Otherwise, we can take  $\{\tilde{f}_i(\mathbf{x}, \mathbf{y}) = f_i(\mathbf{x} + \mathbf{x}_0, \mathbf{y} + \mathbf{y}_0)\}_{i=1}^n$  into consideration. On the other hand, suppose that  $p_{s_1} \leq p_{s_2} \leq \dots \leq p_{s_n}$  where  $\{s_i\}_{i=1}^n$  is a permutation of  $[n]$ . We can define  $\{\hat{f}_i\}_{i=1}^n$  such that  $\hat{f}_{s_i} = f_i$  and consider  $\mathcal{A}$  to take the component  $\hat{f}_{s_i}$  by probability  $p_{s_i}$ .

### 3. A General Analysis Framework

In this section we introduce our construction and show that it enjoys some elegant properties when we use PIFO algorithms to solve it.

#### 3.1. Construction

We first introduce the following class of matrices:

$$\mathbf{B}(m, \omega) \triangleq \begin{bmatrix} & & & -1 & 1 \\ & & & -1 & 1 \\ & \ddots & & & \\ -1 & 1 & & & \\ \omega & & & & \end{bmatrix} \in \mathbb{R}^{m \times m}.$$

Denote the  $l$ -th row of the matrix  $\mathbf{B}(m, \omega)$  by  $\mathbf{b}_l(m, \omega)^\top$ .

Then we define

$$\mathbf{A}(m, \omega) \triangleq \begin{bmatrix} \omega^2 + 1 & -1 & & & \\ -1 & 2 & -1 & & \\ & & \ddots & \ddots & \\ & & & -1 & 2 & -1 \\ & & & -1 & 1 & \end{bmatrix}.$$

It is easy to check the fact that

$$\mathbf{A}(m, \omega) = \mathbf{B}(m, \omega)^\top \mathbf{B}(m, \omega). \quad (3)$$

The matrix  $\mathbf{A}(m, \omega)$  is widely-used in the analysis of lower bounds for first order optimization algorithms (Nesterov,

2013; Agarwal & Bottou, 2015; Lan & Zhou, 2017; Carmon et al., 2017; Zhou & Gu, 2019; Ouyang & Xu, 2018; Zhang et al., 2019).

We partition the rows of  $\mathbf{B}(m, \omega)$  by index sets  $\mathcal{L}_1, \dots, \mathcal{L}_n$ , where  $\mathcal{L}_i = \{l : 1 \leq l \leq m, l \equiv i-1 \pmod{n}\}$ . Then we construct the following class of functions by this partition:

$$r(\mathbf{x}, \mathbf{y}; \boldsymbol{\lambda}, m, \omega) \triangleq \frac{1}{n} \sum_{i=1}^n r_i(\mathbf{x}, \mathbf{y}; \boldsymbol{\lambda}, m, \omega), \quad (4)$$

where  $\boldsymbol{\lambda} = (\lambda_1, \lambda_2, \lambda_3, \lambda_4)$  and

$$\begin{aligned} r_i(\mathbf{x}, \mathbf{y}; \boldsymbol{\lambda}, m, \omega) &= \begin{cases} \lambda_1 \sum_{l \in \mathcal{L}_1} \mathbf{y}^\top \mathbf{e}_l \mathbf{b}_l(m, \omega)^\top \mathbf{x} - \lambda_4 \langle \mathbf{e}_m, \mathbf{x} \rangle \\ \quad + \lambda_2 \|\mathbf{x}\|_2^2 - \lambda_3 \|\mathbf{y}\|_2^2, & \text{for } i = 1, \\ \lambda_1 \sum_{l \in \mathcal{L}_i} \mathbf{y}^\top \mathbf{e}_l \mathbf{b}_l(m, \omega)^\top \mathbf{x} \\ \quad + \lambda_2 \|\mathbf{x}\|_2^2 - \lambda_3 \|\mathbf{y}\|_2^2, & \text{for } i = 2, 3, \dots, n. \end{cases} \end{aligned}$$

The lower bound analysis of the PIFO algorithm for the minimax problem in this paper is based on the function  $r(\mathbf{x}, \mathbf{y}; \boldsymbol{\lambda}, m, \omega)$  and its finite-sum formulation (4).

We show the smoothness, convexity, and concavity of the component function  $r_i$  in Lemma 1.

**Lemma 1.** For any  $\lambda_2 \geq 0, \lambda_3 \geq 0, \omega < \sqrt{2}$ , we have that the  $r_i$  is  $2\sqrt{\lambda_1^2 + 2 \max\{\lambda_2, \lambda_3\}^2}$ -smooth and  $(2\lambda_2, 2\lambda_3)$  convex-concave.

Consider the following minimax optimization problem

$$\min_{\mathbf{x} \in \mathcal{X}} \max_{\mathbf{y} \in \mathcal{Y}} r(\mathbf{x}, \mathbf{y}; \boldsymbol{\lambda}, m, \omega), \quad (5)$$

where  $r$  is defined as Eq. (4) and

$$\begin{aligned} \mathcal{X} &= \begin{cases} \mathbb{R}^m, & \text{if } \lambda_2 > 0, \\ \{\mathbf{x} \in \mathbb{R}^m : \|\mathbf{x}\|_2 \leq R_x\}, & \text{if } \lambda_2 = 0, \end{cases} \\ \mathcal{Y} &= \begin{cases} \mathbb{R}^m, & \text{if } \lambda_3 > 0, \\ \{\mathbf{y} \in \mathbb{R}^m : \|\mathbf{y}\|_2 \leq R_y\}, & \text{if } \lambda_3 = 0, \end{cases} \end{aligned}$$

where  $R_x > 0$  and  $R_y > 0$ .

Note that the strong duality of the problem (5) holds.

**Lemma 2.** For any  $\lambda_2 \geq 0, \lambda_3 \geq 0, R_x > 0, R_y > 0$ , we always have

$$\min_{\mathbf{x} \in \mathcal{X}} \max_{\mathbf{y} \in \mathcal{Y}} r(\mathbf{x}, \mathbf{y}; \boldsymbol{\lambda}, m, \omega) = \max_{\mathbf{y} \in \mathcal{Y}} \min_{\mathbf{x} \in \mathcal{X}} r(\mathbf{x}, \mathbf{y}; \boldsymbol{\lambda}, m, \omega)$$

#### 3.2. Properties of the PIFO Algorithm

Now consider using the PIFO algorithm to solve the problem (5).

We define subspaces  $\mathcal{F}_t = \text{span}\{\mathbf{e}_m, \mathbf{e}_{m-1}, \dots, \mathbf{e}_{m-t+1}\}$  for convex variable  $\mathbf{x}$  and  $\mathcal{G}_t = \text{span}\{\mathbf{e}_1, \mathbf{e}_2, \dots, \mathbf{e}_t\}$  for concave variable  $\mathbf{y}$ , where  $t \in \{1, 2, \dots, m\}$ . Additionally, we let  $\mathcal{F}_0 = \mathcal{G}_0 = \{\mathbf{0}\}$ . The following technical lemma plays a crucial role in our proofs.

**Lemma 3.** *Suppose that  $n \geq 2$  and each function  $r_i$  satisfies  $\lambda_1 \neq 0, \lambda_2, \lambda_3 \geq 0$ . Denote  $\text{prox}_{r_i}^\gamma(\mathbf{x}, \mathbf{y})$  by  $(\mathbf{u}_i, \mathbf{v}_i)$ . Then we have the following results (we omit the parameters of  $r_i$  to simplify the presentation):*

1. *If  $\mathbf{x} \in \mathcal{F}_k$ , then we have  $\mathcal{P}_{\mathcal{X}}(\mathbf{x}) \in \mathcal{F}_k$ ; and if  $\mathbf{y} \in \mathcal{G}_k$ , then we have  $\mathcal{P}_{\mathcal{Y}}(\mathbf{y}) \in \mathcal{G}_k$ .*

2. *If  $\mathbf{x} \in \mathcal{F}_k, \mathbf{y} \in \mathcal{G}_k$  and  $0 \leq k < m$ , we have that*

$$\nabla_{\mathbf{x}} r_i(\mathbf{x}, \mathbf{y}), \mathbf{u}_i \in \begin{cases} \mathcal{F}_{k+1}, & \text{if } k \equiv i - 1 \pmod{n}, \\ \mathcal{F}_k, & \text{otherwise,} \end{cases}$$

and  $\nabla_{\mathbf{y}} r_i(\mathbf{x}, \mathbf{y}), \mathbf{v}_i \in \mathcal{G}_k$ .

3. *If  $\mathbf{x} \in \mathcal{F}_{k+1}, \mathbf{y} \in \mathcal{G}_k$  and  $0 \leq k < m$ , we have that  $\nabla_{\mathbf{x}} r_i(\mathbf{x}, \mathbf{y}), \mathbf{u}_i \in \mathcal{F}_{k+1}$  and*

$$\nabla_{\mathbf{y}} r_i(\mathbf{x}, \mathbf{y}), \mathbf{v}_i \in \begin{cases} \mathcal{G}_{k+1}, & \text{if } k \equiv i \pmod{n}, \\ \mathcal{G}_k, & \text{otherwise.} \end{cases}$$

*Proof.* The results about projection operator are trivial. Next, we can give the closed form expression of the gradient and proximal operation of  $r_i$  as follows

$$\nabla_{\mathbf{x}} r_i(\mathbf{x}, \mathbf{y}) = 2\lambda_2 \mathbf{x} + \lambda_1 \sum_{l \in \mathcal{L}_i} (\mathbf{e}_l^\top \mathbf{y}) \mathbf{b}_l + c_i \mathbf{e}_m,$$

$$\nabla_{\mathbf{y}} r_i(\mathbf{x}, \mathbf{y}) = -2\lambda_3 \mathbf{y} + \lambda_1 \sum_{l \in \mathcal{L}_i} (\mathbf{b}_l^\top \mathbf{x}) \mathbf{e}_l,$$

$$\mathbf{u}_i = \frac{1}{1 + 2\gamma\lambda_2} \left( \mathbf{x} - \gamma\lambda_1 \sum_{l \in \mathcal{L}_i} (\mathbf{e}_l^\top \mathbf{y}) \mathbf{b}_l - \gamma c_i \mathbf{e}_m \right),$$

$$\mathbf{v}_i = \frac{1}{1 + 2\gamma\lambda_3} \left( \mathbf{y} + \gamma\lambda_1 \sum_{l \in \mathcal{L}_i} (\mathbf{b}_l^\top \mathbf{x}) \mathbf{e}_l \right),$$

where  $c_1 = -1$  and  $c_i = 0$  for  $i = 2, \dots, n$ .

If  $\mathbf{x} = \mathbf{y} = \mathbf{0}$ , then we have  $\nabla_{\mathbf{y}} r_i(\mathbf{x}, \mathbf{y}) = \mathbf{v}_i = \mathbf{0}$  and  $\nabla_{\mathbf{x}} r_i(\mathbf{x}, \mathbf{y}) = \mathbf{u}_i = \mathbf{0}$  for  $i \geq 2$ . Only when  $i = 1$ , we have  $\nabla_{\mathbf{x}} r_1(\mathbf{x}, \mathbf{y}), \mathbf{u}_1 \in \mathcal{F}_1$ .

Observe that  $\mathbf{b}_l^\top \mathbf{x} = 0$  for  $\mathbf{x} \in \mathcal{F}_k, l > k$  and  $\mathbf{b}_l \in \mathcal{F}_{l+1}$  for  $1 \leq l < m$ . Then, we have

- if  $\mathbf{y} \in \mathcal{G}_k, k \geq 1$ , then  $y_l \mathbf{b}_l \in \mathcal{F}_k$  for  $l \neq k$  and  $y_k \mathbf{b}_k \in \mathcal{F}_{k+1}$ ;
- if  $\mathbf{x} \in \mathcal{F}_k, k \geq 1$ , then  $(\mathbf{b}_l^\top \mathbf{x}) \mathbf{e}_l \in \mathcal{G}_{k-1}$  and  $(\mathbf{b}_k^\top \mathbf{x}) \mathbf{e}_k \in \mathcal{G}_k$ .

Consequently, we can derive the result of the lemma:

- If  $\mathbf{x} \in \mathcal{F}_k, \mathbf{y} \in \mathcal{G}_k, k \geq 1$ , then

- $\nabla_{\mathbf{y}} r_i(\mathbf{x}, \mathbf{y}), \mathbf{v}_i \in \mathcal{G}_k$ ,
- $\nabla_{\mathbf{x}} r_i(\mathbf{x}, \mathbf{y}), \mathbf{u}_i \in \mathcal{F}_k$  for  $k \notin \mathcal{L}_i$ ;
- $\nabla_{\mathbf{x}} r_i(\mathbf{x}, \mathbf{y}), \mathbf{u}_i \in \mathcal{F}_{k+1}$  for  $k \in \mathcal{L}_i$ .

- If  $\mathbf{x} \in \mathcal{F}_{k+1}, \mathbf{y} \in \mathcal{G}_k, k \geq 1$ , then

- $\nabla_{\mathbf{x}} r_i(\mathbf{x}, \mathbf{y}), \mathbf{u}_i \in \mathcal{F}_{k+1}$ ,
- $\nabla_{\mathbf{y}} r_i(\mathbf{x}, \mathbf{y}), \mathbf{v}_i \in \mathcal{G}_k$  for  $k+1 \notin \mathcal{L}_i$ ,
- $\nabla_{\mathbf{y}} r_i(\mathbf{x}, \mathbf{y}), \mathbf{v}_i \in \mathcal{G}_{k+1}$  for  $k+1 \in \mathcal{L}_i$ .

□

Suppose the time-step  $t_0$  of a PIFO algorithm  $\mathcal{A}$  satisfies  $\mathbf{x}_{t_0} \in \mathcal{F}_k$  and  $\mathbf{y}_{t_0} \in \mathcal{G}_k$ . Then Lemma 3 implies that  $\mathbf{x}_t \in \mathcal{F}_k$  and  $\mathbf{y}_t \in \mathcal{G}_k$  ( $t > t_0$ ) will hold until the algorithm  $\mathcal{A}$  draws the component  $f_i$  such that  $k \in \mathcal{L}_i$ . After that,  $\mathbf{x}_t \in \mathcal{F}_{k+1}$  and  $\mathbf{y}_t \in \mathcal{G}_k$  will hold until  $\mathcal{A}$  draws the component  $f_j$  such that  $k+1 \in \mathcal{L}_j$ .

We can describe the process of using PIFO algorithm  $\mathcal{A}$  to solve Problem (5) by the following lemma.

**Lemma 4.** *Let  $T_0 = 0$  and*

$$T_k = \min\{t : t > T_{k-1}, i_t \equiv \lfloor k/2 \rfloor + 1 \pmod{n}\} \quad (6)$$

for any  $k \geq 1$ . Then we have  $\mathbf{x}_t \in \mathcal{F}_{k-1}$  for  $t < T_{2k-1}$  and  $\mathbf{y}_t \in \mathcal{G}_{k-1}$  for  $t < T_{2k}$ . Moreover, we can write  $T_k$  as the sum of  $k$  independent random variables  $\{Y_l\}_{l=1}^k$ , i.e.,  $T_k = \sum_{l=1}^k Y_l$ , where  $Y_l$  follows a geometric distribution with success probability  $q_l = p_{l'}$  such that

$$l' \equiv \lfloor l/2 \rfloor + 1 \pmod{n} \text{ and } 1 \leq l' \leq n.$$

The basic idea of the lower bound analysis is that we guarantee the PIFO algorithm to extend the spaces of  $\text{span}\{\mathbf{x}_0, \dots, \mathbf{x}_t\}$  and  $\text{span}\{\mathbf{y}_0, \dots, \mathbf{y}_t\}$  slowly as  $t$  is increasing. Lemma 4 shows  $\text{span}\{\mathbf{x}_0, \dots, \mathbf{x}_{T_{2k}}\} \subseteq \mathcal{F}_k$  and  $\text{span}\{\mathbf{y}_0, \dots, \mathbf{y}_{T_{2k+1}}\} \subseteq \mathcal{G}_k$ . Then we can regard quantity  $T_k$  as the one that reflects how  $\text{span}\{\mathbf{x}_0, \dots, \mathbf{x}_t\}$  and  $\text{span}\{\mathbf{y}_0, \dots, \mathbf{y}_t\}$  vary. Because  $T_k$  can be written as the sum of geometrically distributed random variables, we introduce the following lemma for further analysis.

**Lemma 5.** *Let  $\{Y_i\}_{1 \leq i \leq N}$  be independent random variables, and  $Y_i$  follows a geometric distribution with success probability  $p_i$ . Then*

$$\mathbb{P} \left( \sum_{i=1}^N Y_i > \frac{N^2}{4(\sum_{i=1}^N p_i)} \right) \geq 1 - \frac{16}{9N}.$$

Based on Lemmas 4 and 5, we can estimate how many PIFO calls that  $\mathcal{A}$  needs to obtain an output which is close to the solution of Problem (5) sufficiently.

**Lemma 6.** *We consider the minimax Problem (5) and any criterion  $H(\mathbf{x}, \mathbf{y})$  of measuring how  $\mathbf{x}, \mathbf{y}$  close to solution to the problem. Suppose that  $M \geq 1, N = nM/2$  and  $M$  satisfies  $\min_{\mathbf{x} \in \mathcal{X} \cap \mathcal{F}_M} \min_{\mathbf{y} \in \mathcal{Y} \cap \mathcal{G}_M} H(\mathbf{x}, \mathbf{y}) \geq 9\epsilon$ , then we have  $\min_{t \leq N} \mathbb{E}(H(\mathbf{x}_t, \mathbf{y}_t)) \geq \epsilon$ .*

*Proof.* For any  $t \leq N$ , we have

$$\begin{aligned} & \min_{t \leq N} \mathbb{E}(H(\mathbf{x}_t, \mathbf{y}_t)) \\ & \geq \min_{t \leq N} \mathbb{E}(H(\mathbf{x}_t, \mathbf{y}_t) \mid N < T_{2M+1}) \mathbb{P}(N < T_{2M+1}) \\ & \geq \mathbb{E}\left(\min_{\mathbf{x} \in \mathcal{X} \cap \mathcal{F}_M} \min_{\mathbf{y} \in \mathcal{Y} \cap \mathcal{G}_M} H(\mathbf{x}, \mathbf{y})\right) \mathbb{P}(N < T_{2M+1}) \\ & \geq 9\varepsilon \mathbb{P}(T_{2M+1} > N), \end{aligned}$$

where  $T_k$  is defined in Eq. (6), and the second inequality follows from  $\mathbf{x}_t \in \mathcal{F}_M$  and  $\mathbf{y}_t \in \mathcal{G}_M$  for  $t < T_{2M+1}$  by Lemma 4.

Then, according to Lemma 4, we have  $T_{2M+1} = \sum_{l=1}^{2M+1} Y_l$ . Here  $\{Y_l\}_{l=1}^{2M+1}$  are independent random variables where  $Y_l$  follows a geometric distribution with success probability  $q_l = p_{l'}$  such that  $l' \equiv \lfloor l/2 \rfloor + 1 \pmod{n}$  and  $1 \leq l' \leq n$ .

Suppose  $M = s_1 n + s_2$  and  $0 \leq s_2 < n$ . Recalling that  $p_1 \leq p_2 \leq \dots \leq p_n$ , we have

$$\begin{aligned} \sum_{l=1}^{2M+1} q_l &= 2s_1 + 2 \sum_{l=1}^{s_2+1} p_l - p_1 \leq 2s_1 + 2 \sum_{l=1}^{s_2+1} p_l \\ &\leq 2s_1 + 2 \cdot \frac{s_2 + 1}{n} = \frac{2M + 2}{n}. \end{aligned}$$

Hence, we can use Lemma 5 to obtain

$$\begin{aligned} \mathbb{P}\left(\sum_{l=1}^{2M+1} Y_l > \frac{nM}{2}\right) &\geq \mathbb{P}\left(\sum_{l=1}^{2M+1} Y_l > \frac{(2M+1)^2 n}{4(2M+2)}\right) \\ &\geq 1 - \frac{16}{9(M+1)} \geq \frac{1}{9}, \end{aligned}$$

where the first inequality follows from  $(2M+1)^2 > 4M(M+1)$ . Therefore, we achieve the desired result

$$\min_{t \leq N} \mathbb{E}(H(\mathbf{x}_t, \mathbf{y}_t)) \geq 9\varepsilon \mathbb{P}(T_{2M+1} > N) \geq \varepsilon. \quad \square$$

## 4. Main Results

In this section we show the specific construction for the lower bound analysis of minimax problems in different kinds of assumptions. We start with strongly-convex-strongly-concave setting, then consider more general cases.

### 4.1. Strongly-Convex-Strongly-Concave Case

For the lower bound analysis of the strongly-convex-strongly-concave minimax problem, we define the following class of component functions.

**Definition 8.** For fixed  $L, \mu$  and  $n$  such that  $L/\mu \geq \sqrt{2}, \mu > 0, n \geq 2$ , let

$$\alpha = \sqrt{\frac{L^2 - 2\mu^2}{n^2\mu^2} + 1} \text{ and } \boldsymbol{\lambda}_{SC} = \left(\sqrt{\frac{L^2 - 2\mu^2}{4}}, \frac{\mu}{2}, \frac{\mu}{2}, 1\right).$$

Define functions  $f_{SC,i} : \mathbb{R}^{2m} \rightarrow \mathbb{R}$  for  $i = 1, \dots, n$

$$f_{SC,i}(\mathbf{x}, \mathbf{y}) = r_i \left(\mathbf{x}, \mathbf{y}; \boldsymbol{\lambda}_{SC}, m, \sqrt{\frac{2}{\alpha + 1}}\right),$$

and the minimax problem

$$\min_{\mathbf{x} \in \mathbb{R}^m} \max_{\mathbf{y} \in \mathbb{R}^m} F_{SC}(\mathbf{x}, \mathbf{y}) \triangleq \frac{1}{n} \sum_{i=1}^n f_{SC,i}(\mathbf{x}, \mathbf{y}). \quad (7)$$

The following lemma shows that  $F_{SC}$  is  $(\mu, \mu)$ -convex-concave and we can present the closed form of the optimal solution for Problem (7).

**Lemma 7.** Consider minimax problem (7) in Definition 8. Then we have following properties.

1. Each component function  $f_{SC,i}$  is  $L$ -smooth and  $(\mu, \mu)$ -convex-concave.
2. The saddle point of Problem (7) is

$$\begin{cases} \mathbf{x}^* = \frac{2n\mu(\alpha+1)}{L^2-2\mu^2} (q^m, q^{m-1}, \dots, q)^\top, \\ \mathbf{y}^* = \frac{2}{\sqrt{L^2-2\mu^2}} \left(q, q^2, \dots, q^{m-1}, \sqrt{\frac{\alpha+1}{2}} q^m\right)^\top, \end{cases}$$

where  $q = \frac{\alpha-1}{\alpha+1}$ .

*Proof.* The first statement of this lemma can be directly obtained by Lemma 1. The remainder of the proof is focus on the solution of Problem (7).

We can rewrite the function  $F_{SC}$  as follows

$$\begin{aligned} F_{SC}(\mathbf{x}, \mathbf{y}) &= \frac{\mu}{2} (\|\mathbf{x}\|_2^2 - \|\mathbf{y}\|_2^2) - \frac{1}{n} \langle \mathbf{e}_m, \mathbf{x} \rangle \\ &\quad + \sqrt{\frac{L^2 - 2\mu^2}{4n^2}} \langle \mathbf{B}(m, \omega) \mathbf{x}, \mathbf{y} \rangle, \end{aligned}$$

where  $\omega = \sqrt{\frac{2}{\alpha+1}}$ .

Letting the gradient of  $F_{SC}(\mathbf{x}, \mathbf{y})$  be zero, we obtain

$$\begin{cases} \mu \mathbf{x} + \sqrt{\frac{L^2 - 2\mu^2}{4n^2}} \mathbf{B}(m, \omega)^\top \mathbf{y} - \frac{1}{n} \mathbf{e}_m = \mathbf{0}, \\ -\mu \mathbf{y} + \sqrt{\frac{L^2 - 2\mu^2}{4n^2}} \mathbf{B}(m, \omega) \mathbf{x} = \mathbf{0}, \end{cases}$$

which implies

$$\mathbf{y} = \sqrt{\frac{L^2 - 2\mu^2}{4n^2\mu^2}} \mathbf{B}(m, \omega) \mathbf{x}, \quad (8)$$



$$\begin{aligned}
 &\geq \frac{n}{8} \left( -\frac{1}{\log(q)} \right) \log \left( \frac{1}{18\varepsilon} \right) \\
 &\geq \frac{n}{8} \left( \frac{\sqrt{2L^2/\mu^2 - 4}}{4n} + \frac{\sqrt{2}}{4} + h(\sqrt{2}) \right) \log \left( \frac{1}{18\varepsilon} \right) \\
 &= \Omega \left( \left( n + \frac{L}{\mu} \right) \log \left( \frac{1}{18\varepsilon} \right) \right),
 \end{aligned}$$

where we use the fact  $2 \lfloor \beta \rfloor \geq \beta$  for  $\beta \geq 1$ .  $\square$

Zhang & Xiao (2017) considered a specific bilinear case of Problem (1) with  $\mathcal{X} = \mathbb{R}^d$ ,  $\mathcal{Y} = \mathbb{R}^n$  and each individual component function has the form of

$$f_i(\mathbf{x}, \mathbf{y}) = h(\mathbf{x}) + y_i \langle \mathbf{a}_i, \mathbf{x} \rangle - J_i(y_i),$$

where  $h$  is  $\mu_x$ -strongly-convex and  $J_i$  is  $\mu_y$ -strongly-convex. They proposed stochastic primal-dual coordinate (SPDC) method which can find  $\mathcal{O}(\varepsilon)$ -saddle point with at most  $\mathcal{O} \left( \left( n + \sqrt{\frac{nL^2}{\mu_x \mu_y}} \right) \log(1/\varepsilon) \right)$  PIFO queries. Note that  $f$  is  $(\mu_x, \mu_y/n)$ -convex-concave and if we set  $\mu_x = \mu_y/n = \mu$ , the complexity will be  $\mathcal{O} \left( \left( n + \frac{L}{\mu} \right) \log(1/\varepsilon) \right)$ , which implies that our lower bound is tight for this problem.

In general strongly-convex-strongly-concave case, the best known upper bound complexity for IFO/PIFO algorithms is  $\mathcal{O} \left( \left( n + \frac{\sqrt{n}L}{\mu} \right) \log(1/\varepsilon) \right)$  (Palaniappan & Bach, 2016; Luo et al., 2019), which still exist a  $\sqrt{n}$  gap to our lower bound.

## 4.2. Convex-Strongly-Concave Case

We now consider the finite-sum minimax problem whose each individual component is strongly-concave but possibly non-strongly-convex. Our analysis is based on the following functions.

**Definition 9.** For fixed  $L, \mu, n$  and  $R_x$  such that  $L/\mu \geq \sqrt{2}$ ,  $\mu > 0$ ,  $R_x > 0$ ,  $n \geq 2$ , let

$$\gamma = \frac{R_x(L^2 - 2\mu^2)}{4n\mu(m+1)^{3/2}} \text{ and } \boldsymbol{\lambda}_{SCC} = \left( \sqrt{\frac{L^2 - 2\mu^2}{4}}, 0, \frac{\mu}{2}, \gamma \right).$$

Define functions  $f_{SCC,i} : \mathbb{R}^{2m} \rightarrow \mathbb{R}$  for  $i = 1, \dots, n$  as

$$f_{SCC,i}(\mathbf{x}, \mathbf{y}) = r_i(\mathbf{x}, \mathbf{y}; \boldsymbol{\lambda}_{SCC}, m, 1)$$

and the minimax problem

$$\min_{\mathbf{x} \in \mathcal{X}'} \max_{\mathbf{y} \in \mathbb{R}^{2m}} F_{SCC}(\mathbf{x}, \mathbf{y}) \triangleq \frac{1}{n} \sum_{i=1}^n f_{SCC,i}(\mathbf{x}, \mathbf{y}), \quad (11)$$

where  $\mathcal{X}' = \{\mathbf{x} : \|\mathbf{x}\|_2 \leq R_x\}$ .

It is easily checked each component function  $f_{SCC,i}$  is  $L$ -smooth and  $(0, \mu)$ -convex-concave by Lemma 1.

The following lemma helps us to establish the lower bound with respect to the primal dual gap.  $\square$

**Lemma 8.** Let  $\phi(\mathbf{x}) \triangleq \max_{\mathbf{y}} F_{SCC}(\mathbf{x}, \mathbf{y})$  and  $\psi(\mathbf{y}) \triangleq \min_{\mathbf{x} \in \mathcal{X}'} F_{SCC}(\mathbf{x}, \mathbf{y})$ . Then, for  $k = \lfloor \frac{m+1}{2} \rfloor$ , we have

$$\min_{\mathbf{x} \in \mathcal{X}' \cap \mathcal{F}_k} \phi(\mathbf{x}) - \max_{\mathbf{y} \in \mathcal{G}_k} \psi(\mathbf{y}) \geq \frac{(L^2 - 2\mu^2)R_x^2}{16n^2\mu(k+1)^2}.$$

*Proof.* We prove the result as follows

$$\begin{aligned}
 \min_{\mathbf{x} \in \mathcal{X}' \cap \mathcal{F}_k} \phi(\mathbf{x}) - \max_{\mathbf{y} \in \mathcal{G}_k} \psi(\mathbf{y}) &\geq -\frac{2\mu k \gamma^2}{L^2 - 2\mu^2} + \frac{R_x \gamma}{n\sqrt{k+1}} \\
 &= \frac{(L^2 - 2\mu^2)R_x^2}{8n^2\mu} \frac{2(m+1)^{3/2} - k\sqrt{k+1}}{(m+1)^3\sqrt{k+1}} \\
 &\geq \frac{(L^2 - 2\mu^2)R_x^2}{8n^2\mu} \frac{4\sqrt{2} - 1}{8(k+1)^2} > \frac{(L^2 - 2\mu^2)R_x^2}{16n^2\mu(k+1)^2},
 \end{aligned}$$

where the equality is due to  $\gamma = \frac{R_x(L^2 - 2\mu^2)}{4n\mu(m+1)^{3/2}}$ , the first inequality is based on Lemma 17 in Appendix D, and the second inequality is according to  $m+1 < 2 \lfloor \frac{m+1}{2} \rfloor + 1 = 2(k+1)$ ,  $h(\beta) = \frac{2\beta^{3/2} - \beta_0^{3/2}}{\beta^3}$  is a decreasing function when  $\beta > \beta_0$ .  $\square$

Finally, we obtain the PIFO lower bound complexity for finite-sum  $(0, \mu)$ -convex-concave minimax problem.

**Theorem 2.** Suppose that

$$\varepsilon \leq \frac{(L^2 - 2\mu^2)R_x^2}{576n^2\mu}, \text{ and } m = \left\lfloor \frac{R_x}{6n} \sqrt{\frac{L^2 - 2\mu^2}{\mu\varepsilon}} \right\rfloor - 3.$$

In order to find  $(\hat{\mathbf{x}}, \hat{\mathbf{y}})$  such that  $\mathbb{E}(\phi(\hat{\mathbf{x}}) - \psi(\hat{\mathbf{y}})) < \varepsilon$ , the PIFO algorithm  $\mathcal{A}$  needs at least  $\Omega \left( n + \frac{R_x L}{\sqrt{\mu\varepsilon}} \right)$  queries.

*Proof.* Note that  $M \triangleq \lfloor \frac{m+1}{2} \rfloor = \left\lfloor \frac{R_x}{12n} \sqrt{\frac{L^2 - 2\mu^2}{\mu\varepsilon}} \right\rfloor - 1 \geq 1$ . Following Lemma 8, we have

$$\min_{\mathbf{x} \in \mathcal{X}' \cap \mathcal{F}_M} \phi(\mathbf{x}) - \max_{\mathbf{y} \in \mathcal{G}_M} \psi(\mathbf{y}) \geq \frac{(L^2 - 2\mu^2)R_x^2}{16n^2\mu(M+1)^2} \geq 9\varepsilon,$$

where the last inequality is due to  $M+1 \leq \frac{R_x}{12n} \sqrt{\frac{L^2 - 2\mu^2}{\mu\varepsilon}}$ . Hence, following from Lemma 6 with  $H(\mathbf{x}, \mathbf{y}) = \phi(\mathbf{x}) - \psi(\mathbf{y})$ , for  $N = nM/2$ , we know that

$$\min_{t \leq N} \mathbb{E}(\phi(\hat{\mathbf{x}}) - \psi(\hat{\mathbf{y}})) \geq \varepsilon.$$

Therefore, in order to find suboptimal solution  $(\hat{\mathbf{x}}, \hat{\mathbf{y}})$  such that  $\mathbb{E}(\phi(\hat{\mathbf{x}}) - \psi(\hat{\mathbf{y}})) < \varepsilon$ , algorithm  $\mathcal{A}$  needs at least  $N$  PIFO queries, where

$$N = \frac{n}{2} \left( \left\lfloor \frac{R_x}{12n} \sqrt{\frac{L^2 - 2\mu^2}{\mu\varepsilon}} \right\rfloor - 1 \right) = \Omega \left( n + \frac{R_x L}{\sqrt{\mu\varepsilon}} \right).$$

$\square$

We can also provide the lower bound  $\Omega(n)$  if  $\varepsilon < LR_x^2/4$  (see Lemma 21 in Appendix F) and an improved result in convex-strongly-concave case which is formally presented in Corollary 1.

**Corollary 1.** *For any PIFO algorithm  $\mathcal{A}$  and any  $L, \mu, R_x, n, \varepsilon$  such that  $L/\mu \geq \sqrt{2}, R_x > 0, n \geq 2$  and  $\varepsilon \leq \min\{\frac{LR_x^2}{4}, \frac{(L^2-2\mu^2)R_x^2}{576n^2\mu}\}$ , there exist a dimension  $m = \mathcal{O}\left(1 + \frac{R_x L}{n\sqrt{\mu\varepsilon}}\right)$  and  $n$   $L$ -smooth and  $(0, \mu)$ -convex-concave functions  $\{f_i : \mathbb{R}^m \times \mathbb{R}^m \rightarrow \mathbb{R}\}_{i=1}^n$ . In order to find  $\varepsilon$ -suboptimal solution to the problem  $\min_{\|\mathbf{x}\|_2 \leq R_x} \max_{\mathbf{y}} \frac{1}{n} \sum_{i=1}^n f_i(\mathbf{x}, \mathbf{y})$ , algorithm  $\mathcal{A}$  needs at least  $\Omega\left(n + R_x L / \sqrt{\mu\varepsilon}\right)$  queries to  $h_f$ .*

### 4.3. General Convex-Concave Case

The analysis for general convex-concave case is similar to the one of Section 4.2. We consider the following functions.

**Definition 10.** *For fixed  $L, R_x, R_y$  and  $n$  such that  $L, R_x, R_y > 0, n \geq 2$ , let  $\lambda_C = \left(\frac{L}{2}, 0, 0, \frac{LR_y}{2\sqrt{m}}\right)$ . Define functions  $f_{C,i} : \mathbb{R}^{2m} \rightarrow \mathbb{R}$  for  $i = 1, \dots, n$  as*

$$f_{C,i}(\mathbf{x}, \mathbf{y}) = r_i(\mathbf{x}, \mathbf{y}; \lambda_C, m, 1)$$

and the minimax problem

$$\min_{\mathbf{x} \in \mathcal{X}'} \max_{\mathbf{y} \in \mathcal{Y}'} F_C(\mathbf{x}, \mathbf{y}) \triangleq \frac{1}{n} \sum_{i=1}^n f_{C,i}(\mathbf{x}, \mathbf{y}), \quad (12)$$

where  $\mathcal{X}' = \{\mathbf{x} : \|\mathbf{x}\|_2 \leq R_x\}$  and  $\mathcal{Y}' = \{\mathbf{y} : \|\mathbf{y}\|_2 \leq R_y\}$ .

We can prove each component function  $f_{C,i}$  is  $L$ -smooth and convex-concave by Lemma 1.

The following lemma helps us to establish the lower bound with respect to the primal dual gap.

**Lemma 9.** *Let  $\phi_C(\mathbf{x}) \triangleq \max_{\mathbf{y} \in \mathcal{Y}'} F_C(\mathbf{x}, \mathbf{y})$  and  $\psi_C \triangleq \min_{\mathbf{x} \in \mathcal{X}'} F_C(\mathbf{x}, \mathbf{y})$ . Then for  $1 \leq k = \lfloor (m-1)/2 \rfloor$ , we have*

$$\min_{\mathbf{x} \in \mathcal{X}' \cap \mathcal{F}_k} \phi_C(\mathbf{x}) - \max_{\mathbf{y} \in \mathcal{Y}' \cap \mathcal{G}_k} \psi_C \geq \frac{LR_x R_y}{2\sqrt{2}n(k+1)}.$$

*Proof.* By closed-form expression of  $\min_{\mathbf{x} \in \mathcal{X}' \cap \mathcal{F}_k} \phi_C(\mathbf{x})$  and  $\max_{\mathbf{y} \in \mathcal{Y}' \cap \mathcal{G}_k} \psi_C(\mathbf{y})$  from Lemma 19 in Appendix D, we know that

$$\begin{aligned} & \min_{\mathbf{x} \in \mathcal{X}' \cap \mathcal{F}_k} \phi_C(\mathbf{x}) - \max_{\mathbf{y} \in \mathcal{Y}' \cap \mathcal{G}_k} \psi_C(\mathbf{y}) \\ &= \frac{LR_x R_y}{2n\sqrt{m}(k+1)} \geq \frac{LR_x R_y}{2\sqrt{2}n(k+1)}. \end{aligned}$$

□

Then, we obtain a PIFO lower bound complexity for general finite-sum convex-concave minimax problem.

**Theorem 3.** *Suppose that*

$$\varepsilon \leq \frac{LR_x R_y}{36\sqrt{2}n}, \text{ and } m = \left\lfloor \frac{LR_x R_y}{9\sqrt{2}n\varepsilon} \right\rfloor - 1.$$

*In order to find  $(\hat{\mathbf{x}}, \hat{\mathbf{y}})$  such that  $\mathbb{E}(\phi_C(\hat{\mathbf{x}}) - \psi_C(\hat{\mathbf{y}})) < \varepsilon$ , the PIFO algorithm  $\mathcal{A}$  needs at least  $\Omega\left(n + \frac{R_x L}{\sqrt{\mu\varepsilon}}\right)$  queries.*

*Proof.* Let  $M \triangleq \lfloor (m-1)/2 \rfloor = \left\lfloor \frac{LR_x R_y}{18\sqrt{2}n\varepsilon} \right\rfloor - 1 \geq 1$ . Following Lemma 9, we have

$$\begin{aligned} & \min_{\mathbf{x} \in \mathcal{X}' \cap \mathcal{F}_M} \phi_C(\mathbf{x}) - \max_{\mathbf{y} \in \mathcal{Y}' \cap \mathcal{G}_M} \psi_C(\mathbf{y}) \\ & \geq \frac{LR_x R_y}{2\sqrt{2}n \lfloor (m+1)/2 \rfloor} \geq \frac{LR_x R_y}{\sqrt{2}n(m+1)} \geq 9\varepsilon. \end{aligned}$$

Hence, following from Lemma 6 with  $H(\mathbf{x}, \mathbf{y}) = \phi_C(\mathbf{x}) - \psi_C(\mathbf{y})$ , for  $N = nM/2$ , we know that

$$\min_{t \leq N} \mathbb{E}(\phi_C(\mathbf{x}_t) - \psi_C(\mathbf{y}_t)) \geq \varepsilon.$$

Therefore, in order to find an approximate solution  $(\hat{\mathbf{x}}, \hat{\mathbf{y}})$  such that  $\mathbb{E}(\phi_C(\hat{\mathbf{x}}) - \psi_C(\hat{\mathbf{y}})) < \varepsilon$ , the algorithm  $\mathcal{A}$  needs at least  $N$  PIFO queries, where

$$N = \frac{n}{2} \left( \left\lfloor \frac{LR_x R_y}{18\sqrt{2}n\varepsilon} \right\rfloor - 1 \right) = \Omega\left(n + \frac{LR_x R_y}{\varepsilon}\right).$$

□

Note that Theorem 3 requires the condition  $\varepsilon \leq \mathcal{O}(L/n)$  to obtain the desired lower bound. In fact, this assumption can be relaxed into  $\varepsilon \leq \mathcal{O}(L)$  and we show the more general result formally in Corollary 2.

**Corollary 2.** *For any PIFO algorithm  $\mathcal{A}$  and any  $L, R_x, R_y, n, \varepsilon$  such that  $L, R_x, R_y > 0, \varepsilon \leq LR_x R_y/4$  and  $n \geq 2$ , there exist a dimension  $m = \mathcal{O}\left(1 + \frac{LR_x R_y}{n\varepsilon}\right)$  and  $n$   $L$ -smooth and convex-concave functions  $\{f_i : \mathbb{R}^m \times \mathbb{R}^m \rightarrow \mathbb{R}\}_{i=1}^n$ . In order to find  $\varepsilon$ -suboptimal solution to the problem  $\min_{\|\mathbf{x}\|_2 \leq R_x} \max_{\|\mathbf{y}\|_2 \leq R_y} \frac{1}{n} \sum_{i=1}^n f_i(\mathbf{x}, \mathbf{y})$ ,  $\mathcal{A}$  needs at least  $\Omega(n + LR_x R_y/\varepsilon)$  queries to  $h_f$ .*

## 5. Comparison with Related Work

For deterministic convex optimization, Nesterov (2013) introduced a type of quadratic functions based on matrix  $\mathbf{A}(m, \omega)$  to analyze the lower bound of gradient based algorithms. Lan & Zhou (2017) considered the first order stochastic algorithm for finite-sum convex optimization. They constructed a block diagonal matrix by aggregating several ones in the form of  $\mathbf{A}(m, \omega)$  to obtain a tight lower bound. Zhou & Gu (2019) extended the results to more general cases, including sum-of-nonconvex problem and nonconvex optimization. Woodworth & Srebro (2016) designed a type of adversary constructions to analyze finite-sum convex optimization which is also valid for stochastic proximal point iteration.



Ouyang & Xu (2018) first studied the lower bound complexity of first order algorithms for the convex-concave minimax problem. They constructed a class of bilinear functions based on the formulation (3). Recently, Zhang et al. (2019) established a lower bound for strongly-convex-strongly-concave objective functions. However, both of them (Ouyang & Xu, 2018; Zhang et al., 2019) do not cover the stochastic optimization algorithms, which are very popular in machine learning applications.

Our proposed lower bounds analysis framework is the first one which considers the finite-sum minimax problem for PIFO algorithms. Our construction is based on the decomposition of matrix  $\mathbf{B}(m, \omega)$  as formulation (4) in Section 3.1. This strategy is quite different from previous art and it provides a very concise analysis for the query of proximal incremental first-order oracle.

## 6. Conclusion

In this paper, we have studied lower bounds of PIFO algorithms for finite-sum convex-concave minimax optimization problems. We have proposed a novel construction framework, which is very useful to the analysis of stochastic proximal point algorithms. With this framework, we have demonstrated the lower bounds of PIFO algorithms in strongly-convex-strongly-concave case, convex-strongly-concave case and general convex-concave case.

There are still some open problems. Although SPDC matches our lower bound in a specific minimax problem, the upper bound in the general strongly-convex-strongly-concave case remains a  $\sqrt{n}$  gap. Furthermore, to the best of our knowledge, there is no stochastic optimization algorithm that could match our lower bounds for convex-strongly-concave and general convex-concave cases. It would be interesting to devise more efficient algorithms for these settings or improve our lower bounds further. It is also possible to use our framework to address the lower bounds of minimax problems without the convex-concave assumption.

## Acknowledgments

Xie and Zhang have been supported by the National Key Research and Development Project of China (No. 2018AAA0101004), Beijing Natural Science Foundation (Z190001), and Beijing Academy of Artificial Intelligence (BAAI).

## References

Agarwal, A. and Bottou, L. A lower bound for the optimization of finite sums. In *ICML*, 2015.

Arjevani, Y., Carmon, Y., Duchi, J. C., Foster, D. J., Srebro,

N., and Woodworth, B. Lower bounds for non-convex stochastic optimization. *arXiv preprint:1912.02365*, 2019.

Ben-Tal, A., El Ghaoui, L., and Nemirovski, A. *Robust optimization*, volume 28. Princeton University Press, 2009.

Carmon, Y., Duchi, J. C., Hinder, O., and Sidford, A. Lower bounds for finding stationary points I. *arXiv preprint:1710.11606*, 2017.

Carmon, Y., Jin, Y., Sidford, A., and Tian, K. Variance reduction for matrix games. In *Advances in Neural Information Processing Systems*, pp. 11381–11392, 2019.

Chambolle, A. and Pock, T. A first-order primal-dual algorithm for convex problems with applications to imaging. *Journal of mathematical imaging and vision*, 40(1):120–145, 2011.

Chambolle, A. and Pock, T. On the ergodic convergence rates of a first-order primal–dual algorithm. *Mathematical Programming*, 159(1-2):253–287, 2016.

Chen, G. H. and Rockafellar, R. T. Convergence rates in forward–backward splitting. *SIAM Journal on Optimization*, 7(2):421–444, 1997.

Defazio, A. A simple practical accelerated method for finite sums. In *NIPS*, 2016.

Du, S. S., Chen, J., Li, L., Xiao, L., and Zhou, D. Stochastic variance reduction methods for policy evaluation. In *ICML*, 2017.

Fang, C., Li, C. J., Lin, Z., and Zhang, T. SPIDER: Near-optimal non-convex optimization via stochastic path-integrated differential estimator. In *NIPS*, 2018.

Ibrahim, A., Azizian, W., Gidel, G., and Mitliagkas, I. Linear lower bounds and conditioning of differentiable games. *arXiv preprint arXiv:1906.07300*, 2019.

Joachims, T. A support vector method for multivariate performance measures. In *ICML*, 2005.

Korpelevich, G. Extragradient method for finding saddle points and other problems. *Matekon*, 13(4):35–49, 1977.

Lan, G. and Zhou, Y. An optimal randomized incremental gradient method. *Mathematical programming*, pp. 1–49, 2017.

Lin, H., Mairal, J., and Harchaoui, Z. Catalyst acceleration for first-order convex optimization: from theory to practice. *Journal of Machine Learning Research*, 18(212): 1–54, 2018.

- Luo, L., Chen, C., Li, Y., Xie, G., and Zhang, Z. A stochastic proximal point algorithm for saddle-point problems. *arXiv preprint:1909.06946*, 2019.
- Mokhtari, A., Ozdaglar, A., and Pattathil, S. Proximal point approximations achieving a convergence rate of  $O(1/k)$  for smooth convex-concave saddle point problems: Optimistic gradient and extra-gradient methods. *arXiv preprint:1906.01115*, 2019a.
- Mokhtari, A., Ozdaglar, A., and Pattathil, S. A unified analysis of extra-gradient and optimistic gradient methods for saddle point problems: Proximal point approach. *arXiv preprint:1901.08511*, 2019b.
- Nesterov, Y. *Introductory lectures on convex optimization: A basic course*, volume 87. Springer Science & Business Media, 2013.
- Ouyang, Y. and Xu, Y. Lower complexity bounds of first-order methods for convex-concave bilinear saddle-point problems. *arXiv preprint:1808.02901*, 2018.
- Palaniappan, B. and Bach, F. Stochastic variance reduction methods for saddle-point problems. In *NIPS*, 2016.
- Shen, Z., Mokhtari, A., Zhou, T., Zhao, P., and Qian, H. Towards more efficient stochastic decentralized learning: Faster convergence and sparse communication. In *ICML*, 2018.
- Tan, C., Zhang, T., Ma, S., and Liu, J. Stochastic primal-dual method for empirical risk minimization with  $O(1)$  per-iteration complexity. In *NIPS*, 2018.
- Thekumparampil, K. K., Jain, P., Netrapalli, P., and Oh, S. Efficient algorithms for smooth minimax optimization. In *NIPS*, 2019.
- Woodworth, B. and Srebro, N. Tight complexity bounds for optimizing composite objectives. In *NIPS*, 2016.
- Yan, Y., Xu, Y., Lin, Q., Zhang, L., and Yang, T. Stochastic primal-dual algorithms with faster convergence than  $O(1/\sqrt{T})$  for problems without bilinear structure. *arXiv preprint arXiv:1904.10112*, 2019.
- Ying, Y., Wen, L., and Lyu, S. Stochastic online AUC maximization. In *NIPS*, 2016.
- Zhang, J., Hong, M., and Zhang, S. On lower iteration complexity bounds for the saddle point problems. *arXiv preprint:1912.07481*, 2019.
- Zhang, Y. and Xiao, L. Stochastic primal-dual coordinate method for regularized empirical risk minimization. *The Journal of Machine Learning Research*, 18(1):2939–2980, 2017.
- Zhou, D. and Gu, Q. Lower bounds for smooth nonconvex finite-sum optimization. In *ICML*, 2019.

---

## Supplementary Materials

---

### A. The Proof of Lemma 1

*Proof.* Firstly, it is clearly that  $r_i$  is strongly  $(2\lambda_2, 2\lambda_3)$ -convex-concave.

Next, note that for  $l_1, l_2 \in \mathcal{L}_i$ , we have  $|l_1 - l_2| \geq n \geq 2$ , thus  $\mathbf{b}_{l_1}^\top \mathbf{b}_{l_2} = 0$ . With recalling that  $\mathbf{b}_l^\top \mathbf{b}_l \leq 2$ , we have

$$\begin{aligned} \left\| \sum_{l \in \mathcal{L}_i} \mathbf{b}_l \mathbf{e}_l^\top \mathbf{y} \right\|_2^2 &= \sum_{l \in \mathcal{L}_i} \mathbf{y}^\top \mathbf{e}_l \mathbf{b}_l^\top \mathbf{b}_l \mathbf{e}_l^\top \mathbf{y} \leq 2 \sum_{l \in \mathcal{L}_i} \mathbf{y}^\top \mathbf{e}_l \mathbf{e}_l^\top \mathbf{y} \leq 2 \|\mathbf{y}\|_2^2, \\ \left\| \sum_{l \in \mathcal{L}_i} \mathbf{e}_l \mathbf{b}_l^\top \mathbf{x} \right\|_2^2 &= \sum_{l \in \mathcal{L}_i} \mathbf{x}^\top \mathbf{b}_l \mathbf{b}_l^\top \mathbf{x} \leq 2 \|\mathbf{x}\|_2^2. \end{aligned}$$

Consequently, we have

$$\begin{aligned} & \|\nabla r_i(\mathbf{x}_1, \mathbf{y}_2) - \nabla r_i(\mathbf{x}_2, \mathbf{y}_2)\|_2^2 \\ &= \|\nabla_{\mathbf{x}} r_i(\mathbf{x}_1, \mathbf{y}_1) - \nabla_{\mathbf{x}} r_i(\mathbf{x}_2, \mathbf{y}_2)\|_2^2 + \|\nabla_{\mathbf{y}} r_i(\mathbf{x}_1, \mathbf{y}_1) - \nabla_{\mathbf{y}} r_i(\mathbf{x}_1, \mathbf{y}_2)\|_2^2 \\ &= \left\| 2\lambda_2(\mathbf{x}_1 - \mathbf{x}_2) + \lambda_1 \sum_{l \in \mathcal{L}_i} \mathbf{b}_l \mathbf{e}_l^\top (\mathbf{y}_1 - \mathbf{y}_2) \right\|_2^2 + \left\| 2\lambda_3(\mathbf{y}_1 - \mathbf{y}_2) - \lambda_1 \sum_{l \in \mathcal{L}_i} \mathbf{e}_l \mathbf{b}_l^\top (\mathbf{x}_1 - \mathbf{x}_2) \right\|_2^2 \\ &\leq 8(\lambda_2^2 \|\mathbf{x}_1 - \mathbf{x}_2\|_2^2 + \lambda_3^2 \|\mathbf{y}_1 - \mathbf{y}_2\|_2^2) + 2\lambda_1^2 \left\| \sum_{l \in \mathcal{L}_i} \mathbf{b}_l \mathbf{e}_l^\top (\mathbf{y}_1 - \mathbf{y}_2) \right\|_2^2 + 2\lambda_1^2 \left\| \sum_{l \in \mathcal{L}_i} \mathbf{e}_l \mathbf{b}_l^\top (\mathbf{x}_1 - \mathbf{x}_2) \right\|_2^2 \\ &\leq (8 \max\{\lambda_2, \lambda_3\}^2 + 4\lambda_1^2)(\|\mathbf{x}_1 - \mathbf{x}_2\|_2^2 + \|\mathbf{y}_1 - \mathbf{y}_2\|_2^2), \end{aligned}$$

where the first inequality follows from  $(a + b)^2 \leq 2(a^2 + b^2)$ . □

### B. The proof of Lemma 2

*Proof.* At first, for  $\lambda_2 = 0$  or  $\lambda_3 = 0$ , either  $\mathcal{X}$  or  $\mathcal{Y}$  is compact. Then the strong duality holds following from Sion's minimax theorem.

We only need to prove that if a differentiable function  $f(\mathbf{x}, \mathbf{y})$  is strongly-convex-strongly-concave, then there holds

$$\min_{\mathbf{x} \in \mathbb{R}^{d_x}} \max_{\mathbf{y} \in \mathbb{R}^{d_y}} f(\mathbf{x}, \mathbf{y}) = \max_{\mathbf{y} \in \mathbb{R}^{d_y}} \min_{\mathbf{x} \in \mathbb{R}^{d_x}} f(\mathbf{x}, \mathbf{y}).$$

Now assume that  $f(x, y)$  is  $(\mu_x, \mu_y)$ -convex-concave. Let  $\phi(\mathbf{x}) = \max_{\mathbf{y}} f(\mathbf{x}, \mathbf{y})$  and  $\psi(\mathbf{y}) = \min_{\mathbf{x}} f(\mathbf{x}, \mathbf{y})$ .

Define  $\mathbf{y}^*(\mathbf{x}) = \arg \max_{\mathbf{y}} f(\mathbf{x}, \mathbf{y})$ . Note that  $\mathbf{y}^*(\mathbf{x})$  is well-defined according to  $f$  is strongly convex-concave.

By Danskin's theorem, we know that

$$\nabla_{\mathbf{x}} \phi(\mathbf{x}) = \nabla_{\mathbf{x}} f(\mathbf{x}, \mathbf{y}^*(\mathbf{x})).$$

Hence for any  $\mathbf{x}_1, \mathbf{x}_2$ , we have

$$\begin{aligned} \phi(\mathbf{x}_1) - \phi(\mathbf{x}_2) &= \max_{\mathbf{y}} f(\mathbf{x}_1, \mathbf{y}) - f(\mathbf{x}_2, \mathbf{y}^*(\mathbf{x}_2)) \\ &\geq f(\mathbf{x}_1, \mathbf{y}^*(\mathbf{x}_2)) - f(\mathbf{x}_2, \mathbf{y}^*(\mathbf{x}_2)) \geq \langle \nabla_{\mathbf{x}} f(\mathbf{x}_2, \mathbf{y}^*(\mathbf{x}_2)), \mathbf{x}_1 - \mathbf{x}_2 \rangle + \frac{\mu_x}{2} \|\mathbf{x}_1 - \mathbf{x}_2\|_2^2 \end{aligned}$$

$$= \langle \nabla_{\mathbf{x}} \phi(\mathbf{x}_2), \mathbf{x}_1 - \mathbf{x}_2 \rangle + \frac{\mu_x}{2} \|\mathbf{x}_1 - \mathbf{x}_2\|_2^2,$$

which implies  $\phi$  is  $\mu_x$ -strongly convex. Similarly, we also have  $\psi$  is  $\mu_y$ -strongly concave.

Consequently, by denoting  $\mathbf{x}^* = \arg \min_{\mathbf{x}} \phi(\mathbf{x})$  and  $\mathbf{y}^* = \arg \max_{\mathbf{y}} f(\mathbf{x}^*, \mathbf{y})$ , we have  $\min_{\mathbf{x}} \max_{\mathbf{y}} f(\mathbf{x}, \mathbf{y}) = f(\mathbf{x}^*, \mathbf{y}^*)$  and

$$\nabla_{\mathbf{y}} f(\mathbf{x}^*, \mathbf{y}^*) = \mathbf{0}, \quad \nabla_{\mathbf{x}} f(\mathbf{x}^*, \mathbf{y}^*) = \nabla_{\mathbf{x}} \phi(\mathbf{x}^*) = \mathbf{0}.$$

Moreover, by strongly concavity of  $f(\mathbf{x}, \cdot)$  and  $\nabla_{\mathbf{x}} f(\mathbf{x}^*, \mathbf{y}^*) = \mathbf{0}$ , we have  $\mathbf{x}^* = \arg \min_{\mathbf{x}} f(\mathbf{x}, \mathbf{y}^*)$ . Moreover, by Danskin's theorem, it holds

$$\nabla_{\mathbf{y}} \psi(\mathbf{y}^*) = \nabla_{\mathbf{y}} f(\arg \min_{\mathbf{x}} f(\mathbf{x}, \mathbf{y}^*), \mathbf{y}^*) = \nabla_{\mathbf{y}} f(\mathbf{x}^*, \mathbf{y}^*) = \mathbf{0},$$

and  $\mathbf{y}^* = \arg \min_{\mathbf{y}} \psi(\mathbf{y})$ . That is  $\max_{\mathbf{y}} \min_{\mathbf{x}} f(\mathbf{x}, \mathbf{y}) = f(\mathbf{x}^*, \mathbf{y}^*)$ , which is our desired result. □

### C. The Proof of Lemma 5

The proof of Lemma 5 is based on several properties of geometric distribution, which is defined formally as follows.

**Definition 11.** We call a random variable  $X$  following a geometric distribution with success probability  $p > 0$ , namely  $X \sim \text{Geo}(p)$ , if  $X$  satisfies  $\mathbb{P}(X = i) = (1 - p)^{i-1} p$ , for  $i = 1, 2, 3, \dots$ .

We can obtain the probability density function for the sum of two independent geometric random variables as the following lemma is shown.

**Lemma 10.** Let  $X_1 \sim \text{Geo}(p_1)$  and  $X_2 \sim \text{Geo}(p_2)$  be independent random variables. For any positive integer  $j$ , if  $p_1 \neq p_2$ , then

$$\mathbb{P}(X_1 + X_2 > j) = \frac{p_2(1 - p_1)^j - p_1(1 - p_2)^j}{p_2 - p_1}, \quad (13)$$

and if  $p_1 = p_2$ , then

$$\mathbb{P}(X_1 + X_2 > j) = jp_1(1 - p_1)^{j-1} + (1 - p_1)^j. \quad (14)$$

*Proof.* We can compute the probability by its definition as follows:

$$\begin{aligned} \mathbb{P}(X_1 + X_2 > j) &= \sum_{l=1}^j \mathbb{P}(X_1 = l) \mathbb{P}(X_2 > j - l) + \mathbb{P}(X_1 > j) \\ &= \sum_{l=1}^j (1 - p_1)^{l-1} p_1 (1 - p_2)^{j-l} + (1 - p_1)^j \\ &= p_1 (1 - p_2)^{j-1} \sum_{l=1}^j \left( \frac{1 - p_1}{1 - p_2} \right)^{l-1} + (1 - p_1)^j. \end{aligned}$$

Thus if  $p_1 = p_2$ , we have  $\mathbb{P}(X_1 + X_2 > j) = jp_1(1 - p_1)^{j-1} + (1 - p_1)^j$ ; and for  $p_1 \neq p_2$ , we have

$$\begin{aligned} \mathbb{P}(X_1 + X_2 > j) &= p_1 \frac{(1 - p_1)^j - (1 - p_2)^j}{p_2 - p_1} + (1 - p_1)^j \\ &= \frac{p_2(1 - p_1)^j - p_1(1 - p_2)^j}{p_2 - p_1}. \end{aligned}$$

□

Let  $\{X_i\}_{1 \leq i \leq m}$  be independent variables, and  $X_i \sim \text{Geo}(p_i)$  for  $i = 1, \dots, m$ . We define the following auxiliary function for our analysis

$$f_{m,j}(p_1, p_2, \dots, p_m) \triangleq \mathbb{P}\left(\sum_{i=1}^m X_i \geq j\right).$$

To prove Lemma 5, we need to solve the following minimization problems

$$\min_{\sum_{i=1}^m p_i = c} f_{m,j}(p_1, p_2, \dots, p_m),$$

where  $c$  is a given constant.

We first prove the following inequality for our further analysis.

**Lemma 11.** *For any  $x \geq 0$  and  $j \geq 2$ , we have*

$$1 - \frac{j-1}{x+j/2} \leq \left(\frac{x}{x+1}\right)^{j-1}. \quad (15)$$

*Proof.* We just need to show that

$$(x+1)^{j-1}(x+j/2) - (j-1)(x+1)^{j-1} \leq x^{j-1}(x+j/2),$$

that is

$$\begin{aligned} (x+1)^j - j(x+1)^{j-1}/2 - x^{j-1}(x+j/2) &\leq 0, \\ \text{i.e., } \sum_{l=0}^{j-2} \left[ \binom{j}{l} - \frac{j}{2} \binom{j-1}{l} \right] x^l &\leq 0. \end{aligned}$$

Note that for all  $l \leq j-2$ , we have

$$\binom{j}{l} - \frac{j}{2} \binom{j-1}{l} = \left(1 - \frac{j-l}{2}\right) \binom{j}{l} \leq 0,$$

thus inequality (15) holds for any  $x \geq 0$  and  $j \geq 2$ .  $\square$

Now we can show that  $f_{2,j}(p_1, p_2) \geq f_{2,j}\left(\frac{p_1+p_2}{2}, \frac{p_1+p_2}{2}\right)$  as follows.

**Lemma 12.** *Let  $X_1 \sim \text{Geo}(p_1), X_2 \sim \text{Geo}(p_2), Y_1, Y_2 \sim \text{Geo}\left(\frac{p_1+p_2}{2}\right)$  be independent random variables with  $0 < p_1, p_2 \leq 1$ . Then for any positive integer  $j$ , we have*

$$\mathbb{P}(X_1 + X_2 > j) \geq \mathbb{P}(Y_1 + Y_2 > j).$$

*Proof.* We start the proof from the simplest case. It is obviously that for  $j = 1$ , we have  $\mathbb{P}(X_1 + X_2 > j) = 1 = \mathbb{P}(Y_1 + Y_2 > j)$ ; and for  $p_1 = p_2 = 1$  and  $j \geq 2$ , we have  $\mathbb{P}(X_1 + X_2 > j) = 0 = \mathbb{P}(Y_1 + Y_2 > j)$ .

Without loss of generality, we can assume that  $p_1 \leq p_2$ . Let  $j \geq 2$ , and  $c \triangleq p_1 + p_2 < 2$  be a given constant.

Now we prove that  $h(p_1) \triangleq \mathbb{P}(X_1 + X_2 > j)$  is a decreasing function with respect to  $0 < p_1 < c/2$ .

Employing equation (13) in Lemma 10, for  $0 < p_1 < c/2$ , we have

$$h(p_1) = \frac{(c-p_1)(1-p_1)^j - p_1(1+p_1-c)^j}{c-2p_1},$$

and

$$h'(p_1) = \frac{-(1-p_1)^j - j(c-p_1)(1-p_1)^{j-1} - (1+p_1-c)^j - jp_1(1+p_1-c)^{j-1}}{c-2p_1}$$

$$\begin{aligned}
 &+ 2 \frac{(c-p_1)(1-p_1)^j - p_1(1+p_1-c)^j}{(c-2p_1)^2} \\
 &= \frac{[c(1-p_1) - j(c-p_1)(c-2p_1)](1-p_1)^{j-1} - [c(1+p_1-c) + jp_1(c-2p_1)](1+p_1-c)^{j-1}}{(c-2p_1)^2}.
 \end{aligned}$$

Hence  $h'(p_1) < 0$  is equivalent to

$$\frac{c(1-p_1) - j(c-p_1)(c-2p_1)}{c(1+p_1-c) + jp_1(c-2p_1)} < \left( \frac{1+p_1-c}{1-p_1} \right)^{j-1}. \quad (16)$$

Note that

$$\frac{c(1-p_1) - j(c-p_1)(c-2p_1)}{c(1+p_1-c) + jp_1(c-2p_1)} = 1 - \frac{(j-1)c(c-2p_1)}{c(1+p_1-c) + jp_1(c-2p_1)} = 1 - \frac{j-1}{\frac{1+p_1-c}{c-2p_1} + j\frac{p_1}{c}}.$$

Denoting  $x = \frac{1+p_1-c}{c-2p_1}$ , we can rewrite inequality (16) as

$$1 - \frac{j-1}{x + jp_1/c} < \left( \frac{x}{x+1} \right)^{j-1}.$$

Observe that if  $c \leq 1$ , we have  $x > \frac{1-c}{c} \geq 0$ ; and if  $c > 1$ , then  $p_1 \geq c-1$  and  $x \geq \frac{1+c-1-c}{2-c} = 0$ . Together with Lemma 11, we have

$$\left( \frac{x}{x+1} \right)^{j-1} \geq 1 - \frac{j-1}{x + j/2} > 1 - \frac{j-1}{x + jp_1/c}.$$

Consequently,  $h'(p_1) < 0$  holds for any  $p_1 < c/2$  and  $j \geq 2$ .

Along with the fact that  $\lim_{p_1 \rightarrow c/2} h(p_1) = h(c/2)$  according to equation (14), we have

$$\mathbb{P}(X_1 + X_2 > j) \geq \mathbb{P}(Y_1 + Y_2 > j).$$

for any and  $0 < p_1 \leq 1, 0 < p_2 \leq 1$  and positive integer  $j$ . □

Lemma 12 implies that  $\min_{p_1+p_2=c} f_{2,j}(p_1, p_2) = f_{2,j}(c/2, c/2)$ . Moreover, we can establish a similar result for the function  $f_{m,j}(p_1, p_2, \dots, p_m)$ .

**Lemma 13.** For any  $j \geq 1, m \geq 2$  and  $0 < p_i \leq 1 (1 \leq i \leq m)$ , we have

$$\min_{\sum_{i=1}^m p_i=c} f_{m,j}(p_1, p_2, \dots, p_m) = f_{m,j}(c/m, c/m, \dots, c/m).$$

*Proof.* Let  $X_1, X_2, Y_1, Y_2, Z$  be independent random variables where  $Y_1, Y_2 \sim \text{Geo}\left(\frac{p_1+p_2}{2}\right)$  and  $Z$  is a random variable which takes nonnegative integer values.

Following from Lemma 12, we can obtain

$$\begin{aligned}
 \mathbb{P}(Z + X_1 + X_2 > j) &= \sum_{l=0}^{j-1} \mathbb{P}(Z = l) \mathbb{P}(X_1 + X_2 > j-l) + \mathbb{P}(Z > j-1) \\
 &\geq \sum_{l=0}^{j-1} \mathbb{P}(Z = l) \mathbb{P}(Y_1 + Y_2 > j-l) + \mathbb{P}(Z > j-1) \\
 &= \mathbb{P}(Z + Y_1 + Y_2 > j). \quad (17)
 \end{aligned}$$

Next, we define a sequence  $\{(p_{t,1}, p_{t,2}, \dots, p_{t,m})\}_{t \geq 1}$  recursively. At first, let

$$p_{1,i} = p_1, \quad 1 \leq i \leq m.$$

Now suppose  $(p_{t,1}, p_{t,2}, \dots, p_{t,m})$  such that  $\sum_{i=1}^m p_{t,i} = c$  has been obtained. If  $p_{t,1} = p_{t,2} = \dots = p_{t,m} = c/m$ , then we define  $p_{t+1,i} = c/m$  for  $1 \leq i \leq m$ . Otherwise there exists  $k_t$  and  $l_t$  such that  $p_{t,k_t} < c/m < p_{t,l_t}$ , and we define

$$p_{t+1,k_t} = p_{t+1,l_t} = \frac{p_{t,k_t} + p_{t,l_t}}{2}, \quad p_{t,i} = p_{t+1,i} \text{ for } i \neq k_t, l_t.$$

It is clearly that  $\sum_{i=1}^m p_{t+1,i} = c$ . And following from Equation 17, we have

$$f_{m,j}(p_{t,1}, p_{t,2}, \dots, p_{t,m}) \geq f_{m,j}(p_{t+1,1}, p_{t+1,2}, \dots, p_{t+1,m}).$$

If there exists  $T$  such that  $p_{T,1} = p_{T,2} = \dots = p_{T,m} = c/m$ , then our desired conclusion holds apparently. Otherwise, note that

$$\begin{aligned} \sum_{i=1}^m |p_{t+1,i} - c/m| &= \sum_{i=1}^m |p_{t,i} - c/m| + 2|p_{t,k_t} + p_{t,l_t} - 2c/m| - |p_{t,k_t} - c/m| - |p_{t,l_t} - c/m| \\ &< \sum_{i=1}^m |p_{t,i} - c/m|. \end{aligned}$$

Thus the sequence  $\{\sum_{i=1}^m |p_{t,i} - c/m|\}_{t \geq 1}$  is convergent. Suppose that  $\lim_{t \rightarrow \infty} \sum_{i=1}^m |p_{t,i} - c/m| = \theta$ . It is clearly that  $\theta \geq 0$ . If  $\theta > 0$ , then we can choose a subsequence  $\{t_s\}$  such that

$$\lim_{s \rightarrow \infty} p_{t_s,i} = p'_i, \quad \text{for } 1 \leq i \leq m.$$

Apparently, we have  $\sum_{i=1}^m |p'_i - c/m| = \theta > 0$ , and  $\varepsilon_0 \triangleq \min_{i:p'_i \neq c/m} |p'_i - c/m| > 0$ . For  $\varepsilon < \varepsilon_0/(m+2)$ , there exists  $S$  such that  $|p_{t_s,i} - p'_i| < \varepsilon$  for  $1 \leq i \leq m$ . Consequently, we have

$$\begin{aligned} \sum_{i=1}^m |p_{t_s+1,i} - c/m| &= \sum_{i=1}^m |p_{t_s,i} - c/m| + 2|p_{t_s,k_{t_s}} + p_{t_s,l_{t_s}} - 2c/m| - |p_{t_s,k_{t_s}} - c/m| - |p_{t_s,l_{t_s}} - c/m| \\ &= \sum_{i=1}^m |p_{t_s,i} - c/m| + 2|p_{t_s,k_{t_s}} + p_{t_s,l_{t_s}} - 2c/m| + p_{t_s,k_{t_s}} - p_{t_s,l_{t_s}} \\ &\leq \sum_{i=1}^m |p_{t_s,i} - p'_i| + \sum_{i=1}^m |p'_i - c/m| - 2 \min\{c/m - p_{t_s,k_{t_s}}, p_{t_s,l_{t_s}} - c/m\} \\ &< m\varepsilon + \theta + 2\varepsilon - 2 \min\{c/m - p'_{k_{t_s}}, p'_{l_{t_s}} - c/m\} \\ &\leq \theta + (m+2)\varepsilon - 2\varepsilon_0 < \theta, \end{aligned}$$

That is a contradiction. Therefore, we have  $\theta = 0$  and  $\lim_{t \rightarrow \infty} p_{t,i} = c/m$  for  $1 \leq i \leq m$ . Finally, according to the continuity of  $f_{m,j}$ , we get

$$f_{m,j}(p_1, p_2, \dots, p_m) \geq \lim_{t \rightarrow \infty} f_{m,j}(p_{t,1}, p_{t,2}, \dots, p_{t,m}) = f_{m,j}(c/m, c/m, \dots, c/m).$$

□

To prove Lemma 5, we also need a concentration inequality of  $m$  i.i.d. geometric random variables.

**Lemma 14.** *Let  $\{X_i\}_{1 \leq i \leq m}$  be i.i.d. random variables with  $X_1 \sim \text{Geo}(p)$ . Then we have*

$$\mathbb{P}\left(\sum_{i=1}^m X_i > \frac{m}{4p}\right) \geq 1 - \frac{16}{9m}. \quad (18)$$

*Proof.* Denote  $\sum_{i=1}^m X_i$  by  $\tau$ . It is easily to check that

$$\mathbb{E}[\tau] = \frac{m}{p}, \text{ and } \text{Var}(\tau) = \frac{m(1-p)}{p^2}.$$

Hence, we have

$$\begin{aligned} \mathbb{P}\left(\tau > \frac{1}{4}\mathbb{E}\tau\right) &= \mathbb{P}\left(\tau - \mathbb{E}\tau > -\frac{3}{4}\mathbb{E}\tau\right) = 1 - \mathbb{P}\left(\tau - \mathbb{E}\tau \leq -\frac{3}{4}\mathbb{E}\tau\right) \\ &\geq 1 - \mathbb{P}\left(|\tau - \mathbb{E}\tau| \geq \frac{3}{4}\mathbb{E}\tau\right) \geq 1 - \frac{16\text{Var}(\tau)}{9(\mathbb{E}\tau)^2} = 1 - \frac{16m(1-p)}{9m^2} \geq 1 - \frac{16}{9m}. \end{aligned}$$

□

Combining Lemma 13 and Lemma 14, it is easily to deduce the result of Lemma 5.

## D. Technical results for proving Lemma 8 and Lemma 9

In this section, we provide Lemma 17 and Lemma 19 which are used in proofs of Lemma 8 and Lemma 9 respectively.

We first give the following useful lemma.

**Lemma 15.** *Define the function*

$$J_{k,\beta}(y_1, y_2, \dots, y_k) \triangleq y_k^2 + \sum_{i=2}^k (y_i - y_{i-1})^2 + (y_1 - \beta)^2.$$

*Then we have*  $\min J_{k,\beta}(y_1, \dots, y_k) = \frac{\beta^2}{k+1}$ .

*Proof.* Letting the gradient of  $J_{k,\beta}$  equal to zero, we get

$$2y_k - y_{k-1} = 0, \quad 2y_1 - y_2 - \beta = 0, \quad \text{and } y_{i+1} - 2y_i + y_{i-1} = 0, \quad \text{for } i = 2, 3, \dots, k-1.$$

That is,

$$y_i = \frac{k-i+1}{k+1}\beta \text{ for } i = 1, 2, \dots, k. \quad (19)$$

Thus By substituting Equation (19) into the expression of  $J_{k,\beta}(y_1, y_2, \dots, y_k)$ , we achieve the desired result. □

Next, we consider the function  $F_{\text{SCC}}(\mathbf{x}, \mathbf{y})$  in Problem (11). The following lemma provide the closed-form expressions of  $\max_{\mathbf{y}} F_{\text{SCC}}(\cdot, \mathbf{y})$  and  $\max_{\mathbf{x}} F_{\text{SCC}}(\mathbf{x}, \cdot)$ .

**Lemma 16.** *Consider the function  $F_{\text{SCC}}$  defined in Definition 9, we denote*

$$\phi(\mathbf{x}) \triangleq \max_{\mathbf{y}} F_{\text{SCC}}(\mathbf{x}, \mathbf{y}) \quad \text{and} \quad \psi(\mathbf{y}) \triangleq \min_{\mathbf{x} \in \mathcal{X}'} F_{\text{SCC}}(\mathbf{x}, \mathbf{y}).$$

*Then, functions  $\phi(\mathbf{x})$  and  $\psi(\mathbf{x})$  have the closed-form expression as follows:*

$$\phi(\mathbf{x}) = \frac{\xi^2}{2n^2\mu} \|\mathbf{B}(m, 1)\mathbf{x}\|_2^2 - \frac{\gamma}{n} \langle \mathbf{e}_m, \mathbf{x} \rangle \quad \text{and} \quad \psi(\mathbf{y}) = -\frac{R_x}{n} \|\xi \mathbf{B}(m, 1)^\top \mathbf{y} - \gamma \mathbf{e}_m\|_2 - \frac{\mu}{2} \|\mathbf{y}\|_2^2,$$

where  $\xi = \frac{\sqrt{L^2 - 2\mu^2}}{2}$ .

*Proof.* Recall the function  $F_{\text{SCC}}$  in Definition 9 is

$$F_{\text{SCC}}(\mathbf{x}, \mathbf{y}) = -\frac{\mu}{2} \|\mathbf{y}\|_2^2 - \frac{\gamma}{n} \langle \mathbf{e}_m, \mathbf{x} \rangle + \frac{\xi}{n} \langle \hat{\mathbf{B}}\mathbf{x}, \mathbf{y} \rangle,$$



where  $\hat{\mathbf{B}} = \mathbf{B}(m, 1)$ . We can directly compute  $\phi(\mathbf{x})$  as follows:

$$\begin{aligned}\phi(\mathbf{x}) &= \max_{\mathbf{y}} F_{\text{SCC}}(\mathbf{x}, \mathbf{y}) = \max_{\mathbf{y}} \left( -\frac{\mu}{2} \left\| \mathbf{y} - \frac{\xi}{n\mu} \hat{\mathbf{B}}\mathbf{x} \right\|_2^2 + \frac{\xi^2}{2n^2\mu} \left\| \hat{\mathbf{B}}\mathbf{x} \right\|_2^2 - \frac{\gamma}{n} \langle \mathbf{e}_m, \mathbf{x} \rangle \right) \\ &= \frac{\xi^2}{2n^2\mu} \left\| \hat{\mathbf{B}}\mathbf{x} \right\|_2^2 - \frac{\gamma}{n} \langle \mathbf{e}_m, \mathbf{x} \rangle.\end{aligned}$$

On the other hand, there holds

$$\min_{\|\mathbf{x}\|_2 \leq R_x} \langle \mathbf{x}, \xi \hat{\mathbf{B}}^\top \mathbf{y} - \gamma \mathbf{e}_m \rangle \geq \min_{\|\mathbf{x}\|_2 \leq R_x} -\|\mathbf{x}\|_2 \left\| \xi \hat{\mathbf{B}}^\top \mathbf{y} - \gamma \mathbf{e}_m \right\|_2 \geq -R_x \left\| \xi \hat{\mathbf{B}}^\top \mathbf{y} - \gamma \mathbf{e}_m \right\|_2 \quad (20)$$

where the equality will hold when either  $\mathbf{x} = -\frac{R_x}{\left\| \xi \hat{\mathbf{B}}^\top \mathbf{y} - \gamma \mathbf{e}_m \right\|_2} (\xi \hat{\mathbf{B}}^\top \mathbf{y} - \gamma \mathbf{e}_m)$  or  $\xi \hat{\mathbf{B}}^\top \mathbf{y} - \gamma \mathbf{e}_m = \mathbf{0}_m$ . Therefore we have

$$\psi(\mathbf{y}) = \min_{\mathbf{x} \in \mathcal{X}'} F_{\text{SCC}}(\mathbf{x}, \mathbf{y}) = -\frac{R_x}{n} \left\| \xi \hat{\mathbf{B}}^\top \mathbf{y} - \gamma \mathbf{e}_m \right\|_2 - \frac{\mu}{2} \|\mathbf{y}\|_2^2. \quad (21)$$

□

Based on Lemma 16, we can show the following Lemma that is related to the proof of Lemma 8.

**Lemma 17.** Let  $\phi(\mathbf{x}) \triangleq \max_{\mathbf{y}} F_{\text{SCC}}(\mathbf{x}, \mathbf{y})$  and  $\psi(\mathbf{y}) \triangleq \min_{\mathbf{x} \in \mathcal{X}'} F_{\text{SCC}}(\mathbf{x}, \mathbf{y})$ . Then, for  $1 \leq k < m$ , we have

$$\min_{\mathbf{x} \in \mathcal{X}' \cap \mathcal{F}_k} \phi(\mathbf{x}) = \frac{-2\mu k \gamma^2}{L^2 - 2\mu^2}, \quad \text{and} \quad \max_{\mathbf{y} \in \mathcal{G}_k} \psi(\mathbf{y}) \leq -\frac{R_x \gamma}{n\sqrt{k+1}}.$$

*Proof.* The result of Lemma 16 means

$$\begin{aligned}\phi(\mathbf{x}) &= \frac{\xi^2}{2n^2\mu} \left\| \mathbf{B}(m, 1)\mathbf{x} \right\|_2^2 - \frac{\gamma}{n} \langle \mathbf{e}_m, \mathbf{x} \rangle, \\ \psi(\mathbf{y}) &= -\frac{R_x}{n} \left\| \xi \mathbf{B}(m, 1)^\top \mathbf{y} - \gamma \mathbf{e}_m \right\|_2 - \frac{\mu}{2} \|\mathbf{y}\|_2^2,\end{aligned}$$

where  $\xi = \frac{\sqrt{L^2 - 2\mu^2}}{2}$ . For  $\mathbf{x} \in \mathcal{X}' \cap \mathcal{F}_k$ , we can suppose  $\mathbf{x} = \begin{bmatrix} \mathbf{0}_{m-k} \\ \hat{\mathbf{x}} \end{bmatrix}$  and rewrite  $\phi(\mathbf{x})$  as

$$\phi(\mathbf{x}) = \frac{\xi^2}{2n^2\mu} \left\| \mathbf{B}(k, 1)\hat{\mathbf{x}} \right\|_2^2 - \frac{\gamma}{n} \langle \hat{\mathbf{e}}_k, \hat{\mathbf{x}} \rangle \triangleq \phi_k(\hat{\mathbf{x}}),$$

where  $\hat{\mathbf{e}}_k \in \mathbb{R}^k$ . Letting  $\nabla \phi_k(\hat{\mathbf{x}}) = \mathbf{0}$ , we get

$$\mathbf{B}(k, 1)^\top \mathbf{B}(k, 1)\hat{\mathbf{x}} = \frac{n\mu\gamma}{\xi^2} \hat{\mathbf{e}}_k,$$

that is  $\hat{\mathbf{x}} = \frac{n\mu\gamma}{\xi^2} (1, 2, \dots, k)^\top = \frac{4n\mu\gamma}{L^2 - 2\mu^2} (1, 2, \dots, k)^\top$ . Noting that  $\mathbf{x} = \frac{4n\mu\gamma}{L^2 - 2\mu^2} (0, \dots, 0, 1, \dots, k)^\top \in \mathcal{X}'$ , we obtain

$$\min_{\mathbf{x} \in \mathcal{X}' \cap \mathcal{F}_k} \phi(\mathbf{x}) = \frac{-2\mu k \gamma^2}{L^2 - 2\mu^2}.$$

We can upper bound  $\psi(\mathbf{y})$  as

$$\begin{aligned}\psi(\mathbf{y}) &= -\frac{R_x}{n} \left\| \xi \hat{\mathbf{B}}^\top \mathbf{y} - \gamma \mathbf{e}_m \right\|_2 - \frac{\mu}{2} \|\mathbf{y}\|_2^2 \leq -\frac{R_x \xi}{n} \left\| \hat{\mathbf{B}}^\top \mathbf{y} - \frac{\gamma}{\xi} \mathbf{e}_m \right\|_2 \\ &= -\frac{R_x \xi}{n} \sqrt{J_{k, \gamma/\xi}(y_1, y_2, \dots, y_k)} \leq -\frac{R_x \xi}{n} \frac{\gamma}{\xi \sqrt{k+1}} = -\frac{R_x \gamma}{n\sqrt{k+1}},\end{aligned}$$

where the last inequality follows from Lemma 15. □

Then, we consider function  $F_C(\mathbf{x}, \mathbf{y})$  in Problem (11). We can provide the closed-form expressions of  $\max_{\mathbf{y}} F_C(\cdot, \mathbf{y})$  and  $\max_{\mathbf{x}} F_C(\mathbf{x}, \cdot)$ .

**Lemma 18.** Consider the function  $F_C$  defined in Definition 10, we denote

$$\phi_C(\mathbf{x}) \triangleq \max_{\mathbf{y} \in \mathcal{Y}'} F_C(\mathbf{x}, \mathbf{y}) \quad \text{and} \quad \psi_C(\mathbf{y}) \triangleq \min_{\mathbf{x} \in \mathcal{X}'} F_C(\mathbf{x}, \mathbf{y}).$$

Then, functions  $\phi_C(\mathbf{x})$  and  $\psi_C(\mathbf{x})$  have the closed-form expression as follows:

$$\phi_C(\mathbf{x}) = \frac{LR_y}{2n} \|\mathbf{B}(m, 1)\mathbf{x}\|_2 - \frac{LR_y}{2n\sqrt{m}} \langle \mathbf{e}_m, \mathbf{x} \rangle \quad \text{and} \quad \psi_C(\mathbf{y}) = -\frac{LR_x}{2n} \left\| \mathbf{B}(m, 1)^\top \mathbf{y} - \frac{R_y}{\sqrt{m}} \mathbf{e}_m \right\|_2.$$

*Proof.* Recall the function  $F_C$  in Definition 10 is

$$F_C(\mathbf{x}, \mathbf{y}) = \frac{L}{2n} \langle \mathbf{B}(m, 1)\mathbf{x}, \mathbf{y} \rangle - \frac{LR_y}{2n\sqrt{m}} \langle \mathbf{e}_m, \mathbf{x} \rangle.$$

Then we can conclude this statement by similar analysis from Equation (20) to Equation (21) of Lemma 16.  $\square$

We present the following Lemma which is used in the proof of Lemma 9.

**Lemma 19.** Let  $\phi_C(\mathbf{x}) \triangleq \max_{\mathbf{y} \in \mathcal{Y}'} F_C(\mathbf{x}, \mathbf{y})$  and  $\psi_C(\mathbf{y}) \triangleq \min_{\mathbf{x} \in \mathcal{X}'} F_C(\mathbf{x}, \mathbf{y})$ . Then for  $1 \leq k < m$ , we have

$$\min_{\mathbf{x} \in \mathcal{X}' \cap \mathcal{F}_k} \phi_C(\mathbf{x}) = 0, \quad \text{and} \quad \max_{\mathbf{y} \in \mathcal{Y}' \cap \mathcal{G}_k} \psi_C(\mathbf{y}) = -\frac{LR_x R_y}{2n\sqrt{m(k+1)}}.$$

*Proof.* The result of Lemma 18 means

$$\begin{aligned} \phi_C(\mathbf{x}) &= \frac{LR_y}{2n} \|\mathbf{B}(m, 1)\mathbf{x}\|_2 - \frac{LR_y}{2n\sqrt{m}} \langle \mathbf{e}_m, \mathbf{x} \rangle, \\ \psi_C(\mathbf{y}) &= -\frac{LR_x}{2n} \left\| \mathbf{B}(m, 1)^\top \mathbf{y} - \frac{R_y}{\sqrt{m}} \mathbf{e}_m \right\|_2. \end{aligned}$$

Note that

$$\phi_C(\mathbf{x}) = \max_{\mathbf{y} \in \mathcal{Y}'} F_C(\mathbf{x}, \mathbf{y}) \geq \max_{\mathbf{y} \in \mathcal{Y}'} \min_{\mathbf{x} \in \mathcal{X}'} F_C(\mathbf{x}, \mathbf{y}) = \max_{\mathbf{y} \in \mathcal{Y}'} \psi_C(\mathbf{y}) \geq \psi_C(\mathbf{y}^*) = 0,$$

where  $\mathbf{y}^* = \frac{R_y}{\sqrt{m}} \mathbf{1}_m \in \mathcal{Y}'$ , therefore

$$\min_{\mathbf{x} \in \mathcal{X}' \cap \mathcal{F}_k} \phi_C(\mathbf{x}) = \phi_C(\mathbf{0}) = 0.$$

At last, following from Lemma 15, we can obtain

$$\max_{\mathbf{y} \in \mathcal{Y}' \cap \mathcal{G}_k} \psi_C(\mathbf{y}) = \max_{\mathbf{y} \in \mathcal{Y}' \cap \mathcal{G}_k} -\frac{LR_x}{2n} \left\| \mathbf{B}(m, 1)^\top \mathbf{y} - \frac{R_y}{\sqrt{m}} \mathbf{e}_m \right\|_2 = -\frac{LR_x}{2n} \frac{R_y}{\sqrt{m(k+1)}},$$

where the optimal point is  $\tilde{\mathbf{y}}^* = \frac{R_y}{(k+1)\sqrt{m}} (k, k-1, \dots, 1, 0, \dots, 0)^\top$  which satisfies

$$\|\tilde{\mathbf{y}}^*\|_2 = \frac{R_y}{(k+1)\sqrt{m}} \sqrt{\frac{k(k+1)(2k+1)}{6}} \leq R_y.$$

$\square$

## E. The Proof of Corollary 2

The proof of this corollary is based on the observation that we can not reach an  $\varepsilon$ -suboptimal solution of the specific finite-sum convex-concave problem in fewer than  $\Omega(n)$  complexity for  $\varepsilon \leq \mathcal{O}(R_x R_y L)$ .

We consider the following construction.

**Definition 12.** For fixed  $L, R_x, R_y$  and  $n$  such that  $L, R_x, R_y > 0$  and  $n \geq 2$ , we define functions  $\hat{g}_i : \mathbb{R} \rightarrow \mathbb{R}$  for  $i = 1, \dots, n$

$$\hat{g}_i(x, y) = \begin{cases} Lxy - nLR_x y, & \text{for } i = 1, \\ Lxy, & \text{otherwise,} \end{cases}$$

and the minimax problem

$$\min_{|x| \leq R_x} \max_{|y| \leq R_y} \hat{G}(x, y) \triangleq \frac{1}{n} \sum_{i=1}^n \hat{g}_i(x, y) = Lxy - LR_x y. \quad (22)$$

It is easy to check that each component function  $g_i$  is  $L$ -smooth and convex-concave. Moreover, we have

$$\max_{|y| \leq R_y} \hat{G}(x, y) = LR_y |x - R_x|, \quad \text{and} \quad \min_{|x| \leq R_x} \hat{G}(x, y) = -LR_x(|y| + y) \leq 0,$$

and there holds:

$$\min_{|x| \leq R_x} \max_{|y| \leq R_y} \hat{G}(x, y) = \max_{|y| \leq R_y} \min_{|x| \leq R_x} \hat{G}(x, y) = 0.$$

Now we can establish the lower bound complexity for finding  $\varepsilon$ -suboptimal solution to Problem (22).

**Lemma 20.** Consider minimax problem (22) and  $\varepsilon > 0$  such that  $\varepsilon \leq \frac{LR_x R_y}{4}$ . Then in order to find  $(\hat{x}, \hat{y})$  such that

$$\mathbb{E} \left( \max_{|y| \leq R_y} \hat{G}(\hat{x}, y) - \min_{|x| \leq R_x} \hat{G}(x, \hat{y}) \right) < \varepsilon,$$

the PIFO algorithm  $\mathcal{A}$  needs at least  $\Omega(n)$  PIFO queries.

*Proof.* Note that for  $i \geq 2$ , there holds

$$\nabla_x \hat{g}_i(x, y) = Ly, \quad \nabla_y \hat{g}_i(x, y) = Lx, \quad \text{and} \quad \text{prox}_{\hat{g}_i}^\gamma(x, y) = \left( \frac{L\gamma x + y}{L^2\gamma^2 + 1}, \frac{x - L\gamma y}{L^2\gamma^2 + 1} \right),$$

which implies  $x_t = y_t = x_0 = y_0 = 0$  will holds till the PIFO algorithm  $\mathcal{A}$  draws  $\hat{g}_1$ .

Denote  $T = \min\{t : i_t = 1\}$ . Then, the random variable  $T$  follows a geometric distribution with success probability  $p_1$ , and satisfies

$$\mathbb{P}(T \geq n/2) = (1 - p_1)^{\lfloor (n-1)/2 \rfloor} \geq (1 - 1/n)^{(n-1)/2} \geq 1/2, \quad (23)$$

where the last inequality is according to  $h(\beta) = (\frac{\beta}{\beta+1})^{\beta/2}$  is a decreasing function and  $\lim_{\beta \rightarrow \infty} h(\beta) = 1/\sqrt{e} \geq 1/2$ .

For  $N = n/2$  and  $t < N$ , we know that

$$\begin{aligned} & \mathbb{E} \left( \max_{|y| \leq R_y} \hat{G}(x_t, y) - \min_{|x| \leq R_x} \hat{G}(x, y_t) \right) \geq \mathbb{E} \left( \max_{|y| \leq R_y} \hat{G}(x_t, y) - \min_{|x| \leq R_x} \hat{G}(x, y_t) \mid t < T \right) \mathbb{P}(T > t) \\ & = \mathbb{E} \left( \max_{|y| \leq R_y} \hat{G}(0, y) - \min_{|x| \leq R_x} \hat{G}(x, 0) \mid t < T \right) \mathbb{P}(T > t) = \frac{LR_x R_y}{2} \mathbb{P}(T \geq N) \geq LR_x R_y / 4 \geq \varepsilon. \end{aligned}$$

Therefore, in order to find  $(\hat{x}, \hat{y})$  such that  $\mathbb{E} \left( \max_y \hat{G}(\hat{x}, y) - \min_x \hat{G}(x, \hat{y}) \right) < \varepsilon$ , algorithm  $\mathcal{A}$  needs at least  $N = \Omega(n)$  PIFO queries.  $\square$

Then, we can directly obtain Corollary 2 by combing the results of Theorem 3 and Lemma 20.

## F. An Improved Result for Theorem 2

Recall that Theorem 2 shows that we can not reach an  $\varepsilon$ -suboptimal solution of the specific finite-sum  $(0, \mu)$ -convex-concave problem in fewer than  $\Omega\left(n + \frac{R_x L}{\sqrt{\mu \varepsilon}}\right)$  complexity for  $\varepsilon \leq \mathcal{O}\left(\frac{L^2 R_x^2}{n^2 \mu}\right)$ . In the case of  $L/\mu \leq \mathcal{O}(n^2)$ , we can relax the assumption on  $\varepsilon$  into  $\varepsilon \leq \mathcal{O}(LR_x^2)$ . The analysis is similar to Appendix E. We first introduce the following construction.

**Definition 13.** For fixed  $L, \mu, R_x$  and  $n$  such that  $L \geq \mu > 0, R_x > 0$  and  $n \geq 2$ , we define functions  $g_i : \mathbb{R} \rightarrow \mathbb{R}$  for  $i = 1, \dots, n$

$$g_i(x, y) = \begin{cases} \frac{L}{2}(x^2 - y^2) - nLR_x x, & \text{for } i = 1, \\ \frac{L}{2}(x^2 - y^2), & \text{otherwise,} \end{cases}$$

and the minimax problem

$$\min_{|x| \leq R_x} \max_{y \in \mathbb{R}} G(x, y) \triangleq \frac{1}{n} \sum_{i=1}^n g_i(x, y) = \frac{L}{2}(x^2 - y^2) - LR_x x. \quad (24)$$

It is easy to check that each component function  $g_i$  is  $L$ -smooth and  $(0, \mu)$ -convex-concave. Moreover, we have

$$\max_y G(x, y) = \frac{L}{2}x^2 - LR_x x, \quad \text{and} \quad \min_{|x| \leq R_x} G(x, y) = -\frac{LR_x^2}{2} - \frac{L}{2}y^2,$$

and there holds:

$$\min_{|x| \leq R_x} \max_y G(x, y) = \max_y \min_{|x| \leq R_x} G(x, y).$$

Then, we can establish the lower bound complexity for finding  $\varepsilon$ -suboptimal solution to Problem (24) as follows.

**Lemma 21.** Consider minimax problem (24) and  $\varepsilon > 0$  such that  $\varepsilon \leq \frac{LR_x^2}{4}$ . Then in order to find  $(\hat{x}, \hat{y})$  such that

$$\mathbb{E} \left( \max_y G(\hat{x}, y) - \min_{|x| \leq R_x} G(x, \hat{y}) \right) < \varepsilon,$$

the PIFO algorithm  $\mathcal{A}$  needs at least  $\Omega(n)$  PIFO queries.

*Proof.* Note that for  $i \geq 2$ , there holds

$$\nabla_x g_i(x, y) = Lx, \quad \text{prox}_{g_i}^\gamma(x, y) = \left( \frac{x}{L\gamma + 1}, \frac{y}{L\gamma + 1} \right).$$

That implies  $x_t = x_0 = 0$  will hold till the PIFO algorithm  $\mathcal{A}$  draws  $g_1$ . Denote  $T = \min\{t : i_t = 1\}$ . By Equation (23), we have  $\mathbb{P}(T \geq n/2) \geq 1/2$ . Consequently, for  $N = n/2$  and  $t < N$ , we know that

$$\begin{aligned} & \mathbb{E} \left( \max_y G(x_t, y) - \min_{|x| \leq R_x} G(x, y_t) \right) \geq \mathbb{E} \left( \max_y G(x_t, y) - \min_{|x| \leq R_x} G(x, y_t) \mid t < T \right) \mathbb{P}(T > t) \\ & = \mathbb{E} \left( \max_y G(0, y) - \min_{|x| \leq R_x} G(x, y_t) \mid t < T \right) \mathbb{P}(T > t) \geq \frac{LR_x^2}{2} \mathbb{P}(T \geq N) \geq LR_x^2/4 \geq \varepsilon. \end{aligned}$$

Therefore, in order to find  $(\hat{x}, \hat{y})$  such that  $\mathbb{E}(\max_y G(\hat{x}, y) - \min_x G(x, \hat{y})) < \varepsilon$ , algorithm  $\mathcal{A}$  needs at least  $N = \Omega(n)$  PIFO queries.  $\square$

Combing the result of Theorem 2 and Lemma 21, we can directly obtain Corollary 1.

## G. Lower Bound of $\varepsilon$ -suboptimal solution for strongly-convex-strongly-concave case

For strongly-convex-strongly-concave minimax problems, we have established lower bound of  $\varepsilon$ -saddle point in Section 4.1. Similarly, we can also provide the lower bound with respect to  $\varepsilon$ -suboptimal solution.

We consider the function  $F_{SC}$  in Problem (7). We can provide the closed-form of functions  $\min_{\mathbf{x} \in \mathcal{F}_k} F_{SC}(\mathbf{x}, \cdot)$  and  $\max_{\mathbf{y} \in \mathcal{G}_k} F_{SC}(\cdot, \mathbf{y})$ .

**Lemma 22.** Consider the function  $F_{SC}$  defined in Definition 8, we denote  $\phi_{SC}(\mathbf{x}) \triangleq \max_{\mathbf{y} \in \mathcal{Y}} F_{SC}(\mathbf{x}, \mathbf{y})$  and  $\psi_{SC}(\mathbf{y}) \triangleq \min_{\mathbf{x} \in \mathcal{X}} F_{SC}(\mathbf{x}, \mathbf{y})$ . Then for  $1 \leq k < m$ , we have

$$\min_{\mathbf{x} \in \mathcal{F}_k} \phi_{SC}(\mathbf{x}) = -\frac{\mu(\alpha+1)}{L^2-2\mu^2} \frac{q-q^{2k+1}}{1+q^{2k+1}}, \quad \text{and} \quad \max_{\mathbf{y} \in \mathcal{G}_k} \psi_{SC}(\mathbf{y}) = -\frac{1}{n^2\mu(\alpha+1)} \frac{1+q^{2k+1}}{1-q^{2k+2}}.$$

*Proof.* Recall the expression of  $F_{SC}$  is

$$F_{SC}(\mathbf{x}, \mathbf{y}) = \frac{\mu}{2} \left( \|\mathbf{x}\|_2^2 - \|\mathbf{y}\|_2^2 \right) - \frac{1}{n} \langle \mathbf{e}_m, \mathbf{x} \rangle + \frac{\xi}{n} \langle \hat{\mathbf{B}}\mathbf{x}, \mathbf{y} \rangle,$$

where  $\xi = \frac{\sqrt{L^2-2\mu^2}}{2}$  and  $\hat{\mathbf{B}} = \mathbf{B}(m, \omega)$ . Then we have

$$F_{SC}(\mathbf{x}, \mathbf{y}) = -\frac{\mu}{2} \left\| \mathbf{y} - \frac{\xi}{n\mu} \hat{\mathbf{B}}\mathbf{x} \right\|_2^2 + \frac{\xi^2}{2n^2\mu} \left\| \hat{\mathbf{B}}\mathbf{x} \right\|_2^2 + \frac{\mu}{2} \|\mathbf{x}\|_2^2 - \frac{1}{n} \langle \mathbf{e}_m, \mathbf{x} \rangle.$$

Thus we have

$$\phi_{SC}(\mathbf{x}) = \frac{\xi^2}{2n^2\mu} \left\| \hat{\mathbf{B}}\mathbf{x} \right\|_2^2 + \frac{\mu}{2} \|\mathbf{x}\|_2^2 - \frac{1}{n} \langle \mathbf{e}_m, \mathbf{x} \rangle.$$

For  $\mathbf{x} \in \mathcal{F}_k$ , we can suppose  $\mathbf{x} = \begin{bmatrix} \mathbf{0}_{m-k} \\ \hat{\mathbf{x}} \end{bmatrix}$  and rewrite  $\phi_{SC}(\mathbf{x})$  as

$$\phi_{SC}(\mathbf{x}) = \frac{\xi^2}{2n^2\mu} \left\| \mathbf{B}(k, 1)\hat{\mathbf{x}} \right\|_2^2 + \frac{\mu}{2} \|\hat{\mathbf{x}}\|_2^2 - \frac{1}{n} \langle \hat{\mathbf{e}}_k, \hat{\mathbf{x}} \rangle \triangleq \phi_k(\hat{\mathbf{x}}).$$

With letting the gradient of  $\phi_k(\hat{\mathbf{x}})$  equal to zero, we obtain

$$\frac{\xi^2}{n^2\mu} \mathbf{B}(k, 1)^\top \mathbf{B}(k, 1)\hat{\mathbf{x}} + \mu\hat{\mathbf{x}} = \frac{1}{n} \hat{\mathbf{e}}_k,$$

that is

$$\begin{bmatrix} 2+\beta & -1 & & & & \\ -1 & 2+\beta & -1 & & & \\ & & \ddots & \ddots & & \\ & & & -1 & 2+\beta & -1 \\ & & & & -1 & 1+\beta \end{bmatrix} \hat{\mathbf{x}} = \begin{bmatrix} 0 \\ 0 \\ \vdots \\ 0 \\ \frac{\beta}{n\mu} \end{bmatrix}, \quad (25)$$

where  $\beta = \frac{n^2\mu^2}{\xi^2} = \frac{4n^2\mu^2}{L^2-2\mu^2}$ .

Recall that  $\alpha = \sqrt{\frac{L^2-2\mu^2}{n^2\mu^2}} + 1$  and  $q = \frac{\alpha-1}{\alpha+1}$ .  $q$  and  $1/q$  are two roots of the equation

$$z^2 - \left( 2 + \frac{4n^2\mu^2}{L^2-2\mu^2} \right) z + 1 = 0.$$

Then, we can check that the solution to Equation (25) is

$$\hat{\mathbf{x}}^* = \frac{2n\mu(\alpha+1)}{(L^2-2\mu^2)(1+q^{2k+1})} (q^k - q^{k+2}, q^{k-1} - q^{k+3}, \dots, q - q^{2k+1})^\top,$$

and the optimal value of  $\min_{\mathbf{x} \in \mathcal{F}_k} \phi_{\text{SC}}(\mathbf{x})$  is

$$\min_{\mathbf{x} \in \mathcal{F}_k} \phi_{\text{SC}}(\mathbf{x}) = -\frac{\mu(\alpha + 1)}{L^2 - 2\mu^2} \frac{q - q^{2k+1}}{1 + q^{2k+1}}.$$

On the other hand, observe that

$$\begin{aligned} \psi_{\text{SC}}(\mathbf{y}) &= \min_{\mathbf{x}} F_{\text{SC}}(\mathbf{x}, \mathbf{y}) \\ &= \min_{\mathbf{x}} \left( \frac{\mu}{2} \left\| \mathbf{x} + \frac{\xi}{n\mu} \hat{\mathbf{B}}^\top \mathbf{y} - \frac{1}{n\mu} \mathbf{e}_m \right\|_2^2 - \frac{1}{2n^2\mu} \left\| \xi \hat{\mathbf{B}}^\top \mathbf{y} - \mathbf{e}_m \right\|_2^2 - \frac{\mu}{2} \|\mathbf{y}\|_2^2 \right) \\ &= -\frac{1}{2n^2\mu} \left\| \xi \hat{\mathbf{B}}^\top \mathbf{y} - \mathbf{e}_m \right\|_2^2 - \frac{\mu}{2} \|\mathbf{y}\|_2^2 \end{aligned}$$

For  $\mathbf{y} \in \mathcal{G}_k$ , we can suppose  $\mathbf{y} = \begin{bmatrix} \hat{\mathbf{y}} \\ \mathbf{0}_{m-k} \end{bmatrix}$  and rewrite  $\psi_{\text{SC}}(\mathbf{y})$  as

$$\begin{aligned} \psi_{\text{SC}}(\mathbf{y}) &= -\frac{1}{2n^2\mu} \left\| \xi \begin{bmatrix} \mathbf{0}_{m-k-1} \\ -y_k \\ \mathbf{B}(k, 1)\hat{\mathbf{y}} \end{bmatrix} - \mathbf{e}_m \right\|_2^2 - \frac{\mu}{2} \|\mathbf{y}\|_2^2 \\ &= -\frac{\xi^2}{2n^2\mu} y_k^2 - \frac{1}{2n^2\mu} \left\| \xi \mathbf{B}(k, 1)\hat{\mathbf{y}} - \hat{\mathbf{e}}_k \right\|_2^2 - \frac{\mu}{2} \|\hat{\mathbf{y}}\|_2^2 \triangleq \psi_k(\hat{\mathbf{y}}). \end{aligned}$$

Letting the gradient of  $\psi_k(\hat{\mathbf{y}})$  equal to zero, we obtain

$$\begin{aligned} \frac{\xi^2}{n^2\mu} \hat{\mathbf{e}}_k \hat{\mathbf{e}}_k^\top \hat{\mathbf{y}} + \frac{\xi}{n^2\mu} \mathbf{B}(k, 1) (\xi \mathbf{B}(k, 1)\hat{\mathbf{y}} - \hat{\mathbf{e}}_k) + \mu \hat{\mathbf{y}} &= \mathbf{0}_k, \text{ i.e.} \\ \left( \frac{\xi^2}{n^2\mu} (\hat{\mathbf{e}}_k \hat{\mathbf{e}}_k^\top + \mathbf{B}(k, 1)^2) + \mu \mathbf{I}_k \right) \hat{\mathbf{y}} &= \frac{\xi}{n^2\mu} \hat{\mathbf{e}}_1, \end{aligned}$$

that is

$$\begin{bmatrix} 2 + \beta & -1 & & & \\ -1 & 2 + \beta & -1 & & \\ & & \ddots & \ddots & \\ & & & -1 & 2 + \beta & -1 \\ & & & & -1 & 2 + \beta \end{bmatrix} \hat{\mathbf{y}} = \begin{bmatrix} \frac{1}{\xi} \\ 0 \\ 0 \\ \vdots \\ 0 \end{bmatrix}, \quad (26)$$

where  $\beta = \frac{n^2\mu^2}{\xi^2} = \frac{4n^2\mu^2}{L^2 - 2\mu^2}$ . Then, we can check that the solution to above equation is

$$\hat{\mathbf{y}}^* = \frac{2}{\sqrt{L^2 - 2\mu^2}(1 - q^{2k+2})} (q - q^{2k+1}, q^2 - q^{2k}, \dots, q^k - q^{k+2})^\top,$$

and the optimal value of  $\min_{\mathbf{y} \in \mathcal{G}_k} \psi_{\text{SC}}(\mathbf{y})$  is

$$\min_{\mathbf{y} \in \mathcal{G}_k} \psi_{\text{SC}}(\mathbf{y}) = -\frac{1}{2n^2\mu} \left( 1 - \frac{q - q^{2k+1}}{1 - q^{2k+2}} \right) = -\frac{1}{n^2\mu(\alpha + 1)} \frac{1 + q^{2k+1}}{1 - q^{2k+2}}.$$

□

A simple calculation will imply that  $\phi_{\text{SC}}(\mathbf{0}) = 0$  and  $\psi_{\text{SC}}(\mathbf{0}) = -\frac{1}{2n^2\mu}$ , thus we have  $\phi_{\text{SC}}(\mathbf{0}) - \psi_{\text{SC}}(\mathbf{0}) = \frac{1}{2n^2\mu}$ .

Furthermore, we can bound the prime dual gap with  $\mathbf{x}, \mathbf{y}$  restricting in subspace  $\mathcal{F}_k, \mathcal{G}_k$  respectively.

**Lemma 23.** *Using the notations of Lemma 22, we have*

$$\min_{\mathbf{x} \in \mathcal{F}_k} \phi_{\text{SC}}(\mathbf{x}) - \max_{\mathbf{y} \in \mathcal{G}_k} \psi_{\text{SC}}(\mathbf{y}) \geq \frac{q^{2k}}{n^2\mu(\alpha + 1)}.$$

*Proof.* We can show the lower bound based on the closed-form expression of  $\phi_{\text{SC}}(\mathbf{x})$  and  $\psi_{\text{SC}}(\mathbf{y})$  in Lemma 22:

$$\begin{aligned}
 \min_{\mathbf{x} \in \mathcal{F}_k} \phi_{\text{SC}}(\mathbf{x}) - \max_{\mathbf{y} \in \mathcal{G}_k} \psi_{\text{SC}}(\mathbf{y}) &= -\frac{\mu(\alpha+1)}{L^2 - 2\mu^2} \frac{q - q^{2k+1}}{1 + q^{2k+1}} + \frac{1}{n^2\mu(\alpha+1)} \frac{1 + q^{2k+1}}{1 - q^{2k+2}} \\
 &= -\frac{\mu(\alpha^2 - 1)}{(L^2 - 2\mu^2)(\alpha+1)} \frac{1 - q^{2k}}{1 + q^{2k+1}} + \frac{1}{n^2\mu(\alpha+1)} \frac{1 + q^{2k+1}}{1 - q^{2k+2}} \\
 &= \frac{1}{n^2\mu(\alpha+1)} \left( \frac{1 + q^{2k+1}}{1 - q^{2k+2}} - \frac{1 - q^{2k}}{1 + q^{2k+1}} \right) \\
 &= \frac{1}{n^2\mu(\alpha+1)} \frac{2q^{2k+1} + q^{2k} + q^{2k+2}}{(1 - q^{2k+2})(1 + q^{2k+1})} \\
 &\geq \frac{q^{2k}}{n^2\mu(\alpha+1)},
 \end{aligned}$$

where we have recalled that  $\alpha = \sqrt{\frac{L^2 - 2\mu^2}{n^2\mu^2} + 1}$  and  $q = \frac{\alpha-1}{\alpha+1}$ . And the inequality in above equation is according to  $1 + q^{2k+1} \leq 1 + q^3 \leq (1 + q)^2$ . □

Now we can establish the lower complexity bound of the number of queries that the PIFO algorithm  $\mathcal{A}$  needed to find a  $\varepsilon$ -suboptimal solution to Problem (7).

**Theorem 4.** Consider minimax problem (7) and  $\varepsilon > 0$  such that

$$\frac{L}{\mu} \geq \sqrt{n^2 + 2}, \quad \varepsilon \leq \frac{2}{\alpha+1} \left( \frac{\alpha-1}{\alpha+1} \right)^2, \quad \text{and} \quad m = \left\lfloor \frac{\alpha}{4} \log \left( \frac{2}{9(\alpha+1)\varepsilon} \right) \right\rfloor + 1,$$

where  $\alpha = \sqrt{\frac{L^2 - 2\mu^2}{n^2\mu^2} + 1}$ . In order to find  $(\hat{\mathbf{x}}, \hat{\mathbf{y}})$  such that

$$\mathbb{E}(\phi_{\text{SC}}(\hat{\mathbf{x}}) - \psi_{\text{SC}}(\hat{\mathbf{y}})) < \varepsilon(\phi_{\text{SC}}(\mathbf{x}_0) - \psi_{\text{SC}}(\mathbf{y}_0)),$$

the PIFO algorithm  $\mathcal{A}$  needs at least

$$\Omega \left( \left( n + \frac{L}{\mu} \right) \log \left( \frac{n\mu}{L\varepsilon} \right) \right)$$

PIFO queries.

*Proof.* The proof is similar to the one of Theorem 1. At first, recall that for  $L/\mu \geq \sqrt{n^2 + 2}$ , we have  $\alpha = \sqrt{\frac{L^2 - 2\mu^2}{n^2\mu^2} + 1} \geq \sqrt{2}$  and  $q = \frac{\alpha-1}{\alpha+1}$  satisfies

$$\frac{\alpha}{2} + h(\sqrt{2}) \leq -\frac{1}{\log q} \leq \frac{\alpha}{2}.$$

Let  $M = \left\lfloor \frac{\log(9(\alpha+1)\varepsilon/2)}{2 \log q} \right\rfloor$ . The assumption on  $\varepsilon$  and  $m$  imply that  $M \geq 1$  and

$$m = \left\lfloor \frac{\alpha}{4} \log \left( \frac{2}{9(\alpha+1)\varepsilon} \right) \right\rfloor \geq \left\lfloor \frac{\log(9(\alpha+1)\varepsilon/2)}{2 \log q} \right\rfloor + 1 > M.$$

Following from Corollary 23, we obtain

$$\frac{\min_{\mathbf{x} \in \mathcal{F}_M} \phi_{\text{SC}}(\mathbf{x}) - \max_{\mathbf{y} \in \mathcal{G}_M} \psi_{\text{SC}}(\mathbf{y})}{\phi_{\text{SC}}(\mathbf{x}_0) - \psi_{\text{SC}}(\mathbf{y}_0)} \geq \frac{2}{\alpha+1} q^{2M} \geq 9\varepsilon.$$

Hence, following by Lemma 6 with  $M$  and  $N = nM/2$ , we know that

$$\min_{t \leq N} \mathbb{E} \left( \frac{\phi_{\text{SC}}(\mathbf{x}_t) - \psi_{\text{SC}}(\mathbf{y}_t)}{\phi_{\text{SC}}(\mathbf{x}_0) - \psi_{\text{SC}}(\mathbf{y}_0)} \right) \geq \varepsilon.$$

Therefore, in order to find  $(\hat{\mathbf{x}}, \hat{\mathbf{y}})$  such that

$$\mathbb{E} (\phi_{\text{SC}}(\hat{\mathbf{x}}) - \psi_{\text{SC}}(\hat{\mathbf{y}})) < \varepsilon (\phi_{\text{SC}}(\mathbf{x}_0) - \psi_{\text{SC}}(\mathbf{y}_0)),$$

the PIFO algorithm  $\mathcal{A}$  needs at least  $N$  PIFO queries.

Similar to the way we estimator  $N$  in proof of Theorem 1, we can estimate  $N$  here by

$$\begin{aligned} N = Mn/2 &\geq \frac{n}{8} \left( \frac{\sqrt{2L^2/\mu^2 - 4}}{4n} + \frac{\sqrt{2}}{4} + h(\sqrt{2}) \right) \log \left( \frac{2}{9(\alpha + 1)\varepsilon} \right) \\ &= \Omega \left( \left( n + \frac{L}{\mu} \right) \log \left( \frac{n\mu}{L\varepsilon} \right) \right). \end{aligned}$$

□
